# Supplementary material for: Efficient nitrogen reduction to ammonia by fluorine vacancies with a multi-step promoting effect
Source: Royal Society of Chemistry journal article supplement (doi:10.1039/d0ta11566e), 2021-01-01
Supplement: d0ta11566e1.pdf [file d0ta11566e1.pdf]

## Supporting Information for

# Efficient Nitrogen Reduction to Ammonia by Fluorine Vacancies with Multi-step Promoting Effect

Zuochao Wang,<sup>#,a</sup> Xueke Wu,<sup>#,a</sup> Yingnan Qin,<sup>#,a</sup> Yi Han,<sup>a</sup> Dan Zhang,<sup>b</sup> Huan Zhao,<sup>a</sup> Jingqi Chi,<sup>c</sup>

Guangrui Xu,<sup>d</sup> Minghui Wang,<sup>a</sup> Shaoxiang Li,<sup>b</sup> Dan Wang,<sup>a</sup> Jianping Lai,<sup>\*,a</sup> and Lei Wang<sup>\*,a,b</sup>

<sup>a</sup> Key Laboratory of Eco-chemical Engineering, Key Laboratory of Optic-electric Sensing and Analytical Chemistry of Life Science, Taishan Scholar Advantage and Characteristic Discipline Team of Eco Chemical Process and Technology, College of Chemistry and Molecular Engineering, Qingdao University of Science and Technology, Qingdao 266042, P. R. China

<sup>b</sup> Shandong Engineering Research Center for Marine Environment Corrosion and Safety Protection, College of Environment and Safety Engineering, Qingdao University of Science and Technology, Qingdao 266042, P. R. China

<sup>c</sup> College of Chemical Engineering, Qingdao University of Science and Technology, Qingdao 266042, P. R. China

<sup>d</sup> School of Materials Science and Engineering, Qingdao University of Science and Technology, Qingdao 266042, P. R. China.

<sup>#</sup>Equal Contribution

**Chemicals:** Lanthanum acetate hydrate ( $C_6H_9O_6La \cdot xH_2O$ , Shanghai Aladdin Biochemical Technology Co., Ltd., China, 99.9%). Sodium borohydride ( $NaBH_4$ , Shanghai Aladdin Biochemical Technology Co., Ltd., China, 98%). Sodium citrate dihydrate ( $C_6H_5Na_3O_7 \cdot 2H_2O$ , Shanghai Aladdin Biochemical Technology Co., Ltd., China, 99%). Sodium Fluoride ( $NaF$ , Kermel (Tianjin) Trading Co., Ltd. China, 98%). Ammonium chloride ( $^{14}NH_4Cl$ , Tianjin Bodi Chemical Co., Ltd. China, 99.5%;  $^{15}NH_4Cl$ , Morai Chemical, 99 atom%). Lithium sulfate monohydrate ( $Li_2SO_4 \cdot H_2O$ , 99%)

1 were purchased from Aladdin. Nafion solution (5%) was purchase from Sigma-Aldrich. Ethanol  
2 ( $C_2H_6O$ ) were purchased from Sinopharm Chemical Reagent Co., Ltd. Ultrapure water (Millipore  
3 Milli-Q grade) with a resistivity of 18.2 M $\Omega$  was used in all the experiments.

4 **Preparation of LaF<sub>3-x</sub> NSs.** Firstly, 0.632 g of lanthanum acetate and 0.588 g sodium citrate  
5 dissolved in 10 mL water and 20 mL water, respectively. Then the two solutions were mixed under  
6 the constantly stirring at the room temperature. After 30 mins, 1.05 g sodium fluoride dissolved in 30  
7 mL water and then added into the above solution. Lastly the mixture was transfered into a 100 mL  
8 Teflon-lined autoclave and maintained at 180 °C for 24 h. After the autoclave cooled down naturally,  
9 the products were washed by water and ethanol for 3 times, and received powders LaF<sub>3</sub> nanosheets  
10 were dried at 60 °C overnight.

11 **Preparation of Fv-LaF<sub>3-x</sub> NSs.** 20 mg of LaF<sub>3</sub> NSs were added into 20 mL water containing the 0.2  
12 g of sodium borohydride solution and stirring for different time in 0, 1, 2, 3 and 4 h (note as  
13 Fv-LaF<sub>3-x</sub> nanosheets, x represent for different time).

14 **Characterization.** X-ray diffraction (XRD) analysis at a scanning rate of 5 ° min<sup>-1</sup> in the 2 $\theta$  ranges  
15 from 20 to 80 ° was used to examine the composition of the as-synthesized samples on X'Pert PRO  
16 MPD. Scanning electron microscopy (SEM) measurement was collected on Hitachi, S-8200 to  
17 investigate the structure and morphology of the samples. Transmission electron microscopy (TEM)  
18 and high-resolution TEM (HRTEM) measurements were performed on JEM-2100UHR with  
19 operating at 200 kV. X-ray photoelectron spectrum (XPS) was conducted using a VG ESCALABMK  
20 II spectrometer with AlK $\alpha$  (1486.6 eV) photon source. All the electrochemical performances of the

1 as-synthesized samples were carried out on an electrochemical station (CHI 760E). The  $^1\text{H}$  NMR  
2 spectrum was obtained on a Bruker 500 with Probe TXI at room temperature of 25 °C using 3 mm  
3 tube. The electrolyte after electrolysis was collected, lyophilized and further dissolved in 1 M HCl  
4 solution ( $\text{D}_2\text{O}/\text{H}_2\text{O}$  mixed solution). The IC data were collected by an IC (863 Basic IC Plus.  
5 Metrohm, Switzerland) equipped with a Metrosep C Supp 4-250/4.0 column.  $\text{N}_2$ -TPD of  $\text{N}_2$   
6 experiments were conducted on a Quantachrome ChemBET Pulsar TPR/TPD. These four samples  
7 were first pretreated at 150 °C for 1 h in a 50 mL/min He stream and then cooled to 50 °C under a He  
8 atmosphere. These samples were adsorbed to  $\text{N}_2$  for 3 h, and the remaining  $\text{N}_2$  was purged by He for  
9 half an hour. Finally, the desorption of  $\text{N}_2$  was carried out by heating from 50 °C to 500 °C at a rate  
10 of 10 °C  $\text{min}^{-1}$ .

11 **Electrochemical measurements.** Electrochemical measurements were conducted on a CHI760  
12 Electrochemical Workstation (Shanghai Chenhua Instrument Corporation, China) in a conventional  
13 three-electrode cell by using a graphite rod electrode as the counter electrode and a saturated calomel  
14 electrode as the reference electrode. For the NRR test, the chronoamperometry experiments were  
15 conducted in  $\text{N}_2$ -saturated 0.1 M  $\text{Li}_2\text{SO}_4$  solution (Notably, the  $\text{Li}_2\text{SO}_4$  used was pretreated at 800 °C  
16 about 4 h in Ar.) with stirring at 450 rpm. Firstly, 5.0 mg of Fv- $\text{LaF}_3$ -2 nanosheets were dispersed in  
17 Nafion alcohol solution containing 0.5 mL ethanol, 0.5 mL  $\text{H}_2\text{O}$  and 50  $\mu\text{L}$  Nafion (5 wt%). Until  
18 sonicated for 1 h, it formed a uniform solution. The carbon-paper electrode was prepared by  
19 dropping the obtained solution onto a piece of carbon paper ( $1 \times 1 \text{ cm}^2$ ), then 30  $\mu\text{L}$  of the catalyst  
20 was dropped onto the carbon cloth surface for further electrochemical tests. All the potentials  
21 reported in this work were converted to the reversible hydrogen electrode (RHE). The polarization

1 curves were obtained at a scan rate of  $5 \text{ mV s}^{-1}$  in  $0.1 \text{ M Li}_2\text{SO}_4$  solution. The two electrolytic cells  
2 were connected by a salt bridge. The double-cell electrolytic cell consists of two single-cell  
3 electrolytic cells made of glass and is equipped with a sealable lid. The lid was drilled by a tool of a  
4 specific size and matched with the size of the three electrodes, and the electrolytic cells are  
5 connected by a salt bridge. The salt bridge is composed of agar, potassium chloride and ultrapure  
6 water. All potentials in the text are based on the reversible hydrogen electrode (RHE). The potentials  
7 were converted to the RHE scale according to the following equation:

$$8 \quad E(\text{RHE}) = E(\text{SCE}) + (0.244 + 0.059 \times \text{pH}) \text{ V.}$$

9 Before the electrolysis, the electrolyte was presaturated by  $\text{N}_2$  gas bubbling for at least 30 min (~50  
10 sccm). The purity grade of the gas used in this work is 99.999%. During the electrolysis,  $\text{N}_2$  or Ar  
11 (~20 sccm) were continuously bubbled to the electrolyte with stirring. The given potentials were iR  
12 compensated (95 %). The temperature was kept at around  $25 \text{ }^\circ\text{C}$ . Calculation of the Faradaic  
13 efficiency and the yield rate.

14 The yield rate of  $\text{NH}_3$  can be calculated as follows:

$$15 \quad \text{Yield rate} = (c(\text{NH}_4^+) \times V) / (m_{\text{cat}} \times t)$$

16 Where  $c(\text{NH}_4^+)$  is the measured  $\text{NH}_3$  concentration,  $V$  is the volume of the electrolyte,  $m_{\text{cat}}$  is the  
17 metal mass of the catalyst (typically  $0.15 \text{ mg}$ ) and  $t$  is the reduction time.

18 The  $\text{NH}_3$  yield was calculated using the following equation:

$$19 \quad \text{Yield rate} = (c(\text{NH}_4^+) \times V) / (t \times A)$$

1 where  $F$  is the faraday constant,  $c(\text{NH}_4^+)$  is the measured concentration of  $\text{NH}_4^+$ ,  $V$  is the electrolyte  
2 volume,  $A$  is the geometric area of the cathode ( $1 \text{ cm}^2$ ) and  $t$  is the reduction time.

3 The Faradaic efficiency was estimated from the charge consumed for  $\text{NH}_3$  production and the total  
4 charge passed through the electrode:

$$5 \text{ Faradaic efficiency} = 3 \times F \times c(\text{NH}_4^+) \times V / (17 \times Q)$$

6  $F$  is the Faraday constant ( $96\,485 \text{ C mol}^{-1}$ ),  $Q$  is the quantity of applied electricity.

7 The reported  $\text{NH}_3$  yield rate, Faradaic efficiency, and error bars were determined by three  
8 measurements of independent samples under the same conditions.

#### 9 **Determination of ammonia:**

10 The produced  $\text{NH}_3$  was quantitatively determined using the indophenol blue method.<sup>1</sup> Typically, 1  
11 mL of the sample solution was first pipetted from the post-electrolysis electrolyte. Afterward, 1 mL  
12 of 1 M NaOH solution containing salicylic acid (5 wt%) and sodium citrate (5 wt%) was added, and  
13 0.5 mL of NaClO solution (0.05 M) and 0.1 mL of sodium nitroferricyanide solution (1 wt%) were  
14 added subsequently. After 2 h, the absorption spectra of the resulting solution were acquired with an  
15 ultraviolet-visible (UV-vis) spectrophotometer (BioTek Synergy H1 Hybrid Multi-Mode Reader).  
16 The formed indophenol blue was measured by absorbance at  $\lambda = 655 \text{ nm}$ . In specific, 1 mL  
17 postelectrolyzed electrolyte was filtered by a nylon membrane filter (220 nm) and then injected  
18 directly into the ion chromatograph. The  $\text{NH}_4^+$  calibration curves were established by a set of standard  
19 solutions with different lithium sulfate concentrations. The signal of  $\text{NH}_4^+$  in ion chromatograph spectra  
20 was located at 9.5 min. The concentration ( $\text{NH}_4^+$ ) absorbance curve used for estimation of  $\text{NH}_3$   
21 amount was calibrated using standard  $\text{NH}_4\text{Cl}$  solution with  $\text{NH}_4^+$  concentrations of 0.0, 0.2, 0.4, 0.6,  
22 0.8, and  $1.0 \mu\text{g mL}^{-1}$  in 0.1 M  $\text{Li}_2\text{SO}_4$ . The fitting curve ( $y = 0.509x + 0.04065$ ,  $R^2 = 0.999$ ) showed

1 a good linear relation between the  $\text{NH}_4^+$  concentration and absorbance.

2  **$^{15}\text{N}_2$  isotope labelling experiments.** The produced  $\text{NH}_3$  was detected by the  $^1\text{H}$  NMR.  $^{15}\text{N}_2$  (99%,  
3 provided by the Shanghai Aladdin Biochemical Technology Co., Ltd) was used to further verify the  
4 N-source of  $\text{NH}_3$  produced. All the gases were purified by the Cu impurity trap. Before the  
5 electrolysis, the Ar was plunged into the electrolyte about 1 h, then  $^{15}\text{N}_2$  was plunged into the  
6 electrolyte to saturation. The electrolyte after electrolysis at -0.1 V vs. RHE was collected,  
7 lyophilized, and further dissolved in the solution of 1 M HCl,  $\text{D}_2\text{O}$  and  $\text{H}_2\text{O}$ . Then the  $^{15}\text{NH}_3$   
8 produced was detected by the  $^1\text{H}$  NMR spectrum (Bruker 500). The procedure that detected  $^{14}\text{NH}_3$   
9 produced was the same except the  $^{14}\text{N}_2$  (99.999%) was used. The standard curves were calibrated by  
10 using a series of concentrations of  $\text{NH}_4\text{Cl}$ . And the fitting curves are  $y=0.034x+0.004$ ,  $R^2=0.999$  and  
11  $y=0.036x-0.002$ ,  $R^2=0.998$ .

12 **Determination of  $\text{NO}_x$ :**  $\text{NO}_x$  was determined using N-(1-naphthyl) ethylenediamine  
13 dihydrochloride spectrophotometric method with some modification.<sup>2</sup> Specifically, 0.4 g of sulfanilic  
14 acid was dissolved in 5 mL of  $\text{H}_2\text{O}$  and 1 mL of phosphoric acid. Then add 20 mg of  
15 n-(1-naphthyl)-ethylenediamine dihydrochloride and dilute the volume to 100 mL to obtain the  
16 chromogenic agent. 1 mL treated electrolyte was mixed with 4 mL chromogenic agent and left in  
17 darkness for 30 min, and measure the UV-Vis absorption spectrum at 540 nm. Calibrate the  
18 concentration-absorbance curve with a series of standard potassium nitrite solutions in 0.1 M  $\text{Li}_2\text{SO}_4$   
19 solution.

20 **In situ surface-enhanced infrared absorption spectroscopy with the attenuated total reflection**  
21 **(ATR-SEIRAS) technique:** Silicon planar gold plating film operation process: Preparation of gold  
22 plating solution. preparation of solution A: 0.1222 g NaOH and 0.2286 g  $\text{NaAuCl}_4 \cdot 2\text{H}_2\text{O}$  were  
23 dissolve in 3mL deionized water and ultrasound for 1 h. Preparation of solution B: 0.134 g  $\text{NH}_4\text{Cl}$ ,  
24 0.9468 g  $\text{Na}_2\text{SO}_3$ , and 0.6202 g  $\text{Na}_2\text{S}_2\text{O}_3 \cdot 5\text{H}_2\text{O}$  were all dissolved in 50mL deionized water and

1 dispersed by ultrasound for 1h. Mixed solution A and solution B, added 50 mL deionized water, and  
2 fully ultrasonic for 2 h. Silicon crystal plating preparation: First, soaked the silicon crystal in aqua  
3 regia ( $V_{\text{HCl}}: V_{\text{HNO}_3}=3: 1$ ) for 30 min, then, rinsed with deionized water. Second, grinded silicon  
4 crystal plating on the electrode cloth with 50  $\mu\text{m}$   $\text{Al}_2\text{O}_3$  powder clockwise for 10min, and then  
5 cleaned with deionized water. Third, treated with deionized water and acetone alternately for 5 times:  
6 2 min, 1 min, 1 min, 1 min, 2 min, respectively. Forth, use oxidizing liquid ( $V_{\text{H}_2\text{SO}_4}: V_{\text{H}_2\text{O}_2} = 3:1$ ),  
7 took out and rinsed with deionized water. Last, soaked silicon crystal plating in 40%  $\text{NH}_4\text{F}$  solution  
8 for 4-5 min, washed with deionized water. Deposition of gold film: First, put 15 mL gold plating  
9 solution into a 25 mL beaker, dropped 3.4 mL 2% HF into solution after preheated for 2 min in water  
10 bath at 50-55  $^\circ\text{C}$ . Second, immersed the prepared silicon crystal in the above solution for 4-5 min.  
11 Finally, the gold plating layer can be obtained by washing with deionized water. All ATR-SEIRAS  
12 spectra were carried out in transmission units by subtracting the reference spectrum obtained at -0.1  
13 vs. RHE.

14 **Hydrazine quantification.** The hydrazine present in the electrolyte was estimated by the method of  
15 Watt and Chrisp.<sup>3</sup> First, the preparation of the color developing reagent was carried out by mixing  
16  $\text{C}_9\text{H}_{11}\text{NO}$  (5.99 g), HCl (30 mL) and  $\text{C}_2\text{H}_5\text{OH}$  (300 mL). Then, 1.0 mL of the electrolyte solution  
17 was mixed with 1.0 mL of the color developing reagent, and rapidly stirred at room temperature for  
18 15 min. Finally, the absorbance was measured at a wavelength of 455 nm using a UV-vis 2700  
19 spectrophotometer. The standard curve method was also used to estimate the concentration of  $\text{N}_2\text{H}_4$   
20 produced in the electrolyte. A fitted curve of 0.1 M  $\text{Li}_2\text{SO}_4$  solution ( $y = 1.184x+0.02371$ ,  $R^2=0.999$ )  
21 with  $\text{N}_2\text{H}_4$  concentrations of 0.0, 0.2, 0.4, 0.6, 0.8 and 1.0  $\mu\text{g mL}^{-1}$  showed a good linear relationship  
22 between  $\text{N}_2\text{H}_4$  concentration and absorbance.

### 23 **Calculation Setup**

24 DFT calculations were performed in the Vienna ab initio simulation package (VASP). A

1 spin-polarized GGA PBE functional, all-electron plane-wave basis sets with an energy cutoff of 520  
2 eV, and a projector augmented wave (PAW) method were adopted. A (3×3×1) Monkhorst-Pack mesh  
3 was used for the Brillouin-zone integrations to be sampled. The conjugate gradient algorithm was  
4 used in the optimization. The convergence threshold was set  $1 \times 10^{-4}$  eV in total energy and 0.05 eV/  
5 Å in force on each atom.

6 The adsorption energy change ( $\Delta E_{\text{abs}}$ ) was determined as follows:

$$7 \quad \Delta E_{\text{abs}} = E_{\text{total}} - E_{\text{sur}} - E_{\text{mol}}$$

8 where  $E_{\text{total}}$  is the total energy for the adsorption state,  $E_{\text{sur}}$  is the energy of pure surface,  $E_{\text{mol}}$  is the  
9 energy of molecule.

10 The free energy change ( $\Delta G$ ) for adsorptions were determined as follows:

$$11 \quad \Delta G = E_{\text{total}} - E_{\text{sur}} - E_{\text{mol}} + \Delta E_{\text{ZPE}} - T\Delta S$$

12 where  $E_{\text{total}}$  is the total energy for the adsorption state,  $E_{\text{sur}}$  is the energy of pure surface,  $\Delta E_{\text{ZPE}}$  is the  
13 zero-point energy change and  $\Delta S$  is the entropy change.

14

15

16

17

18

19

20

21

22

23

24

25

26



1 **Figures**

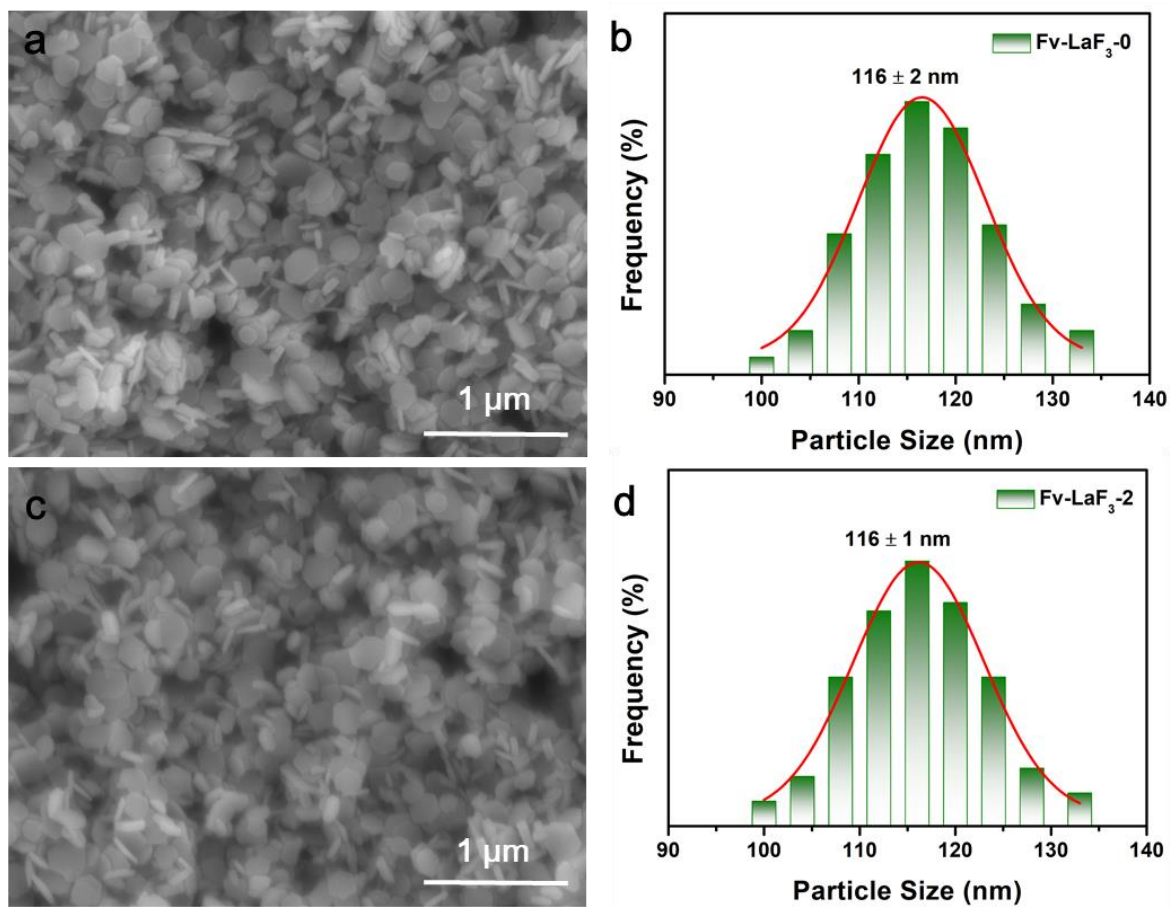

2

3

**Figure S1.** SEM images and particle size histogram for Fv-LaF<sub>3</sub>-0 NSs and Fv-LaF<sub>3</sub>-2 NSs.

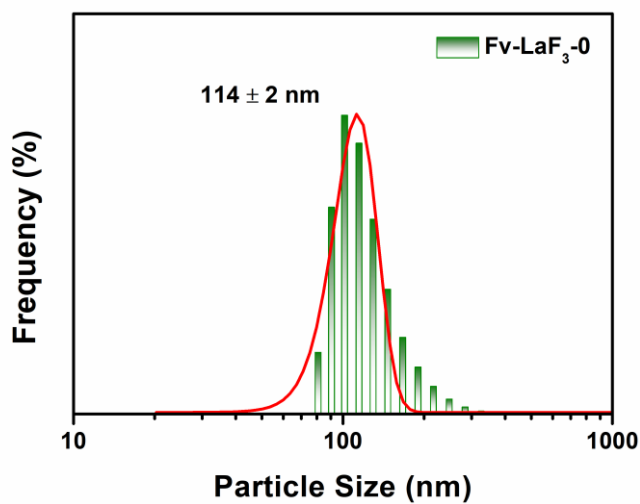

4

5

**Figure S2.** The DLS image of Fv-LaF<sub>3</sub>-0 NSs.

6

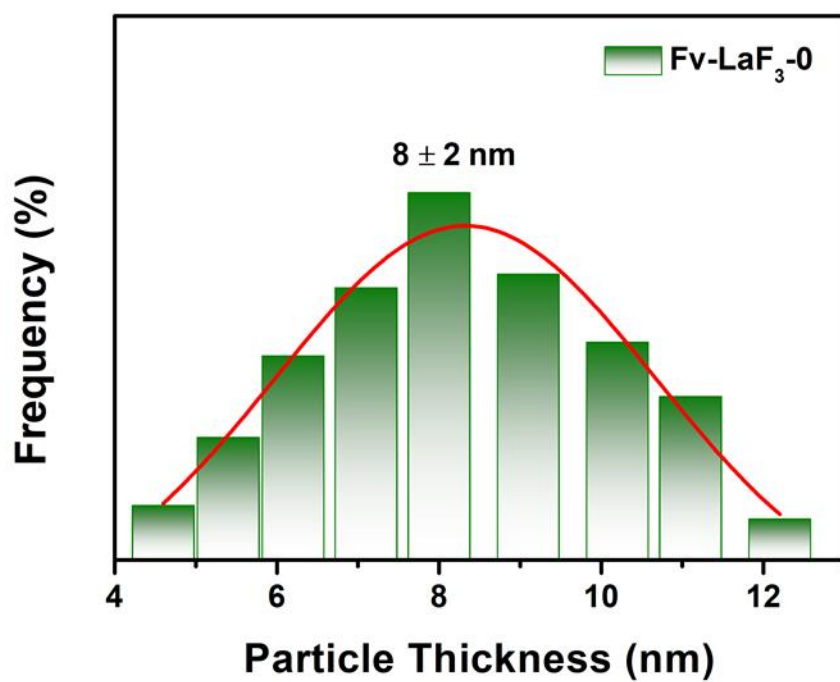

1

2

**Figure S3.** Particle thickness histogram of Fv-LaF<sub>3</sub>-0 NSs.

3

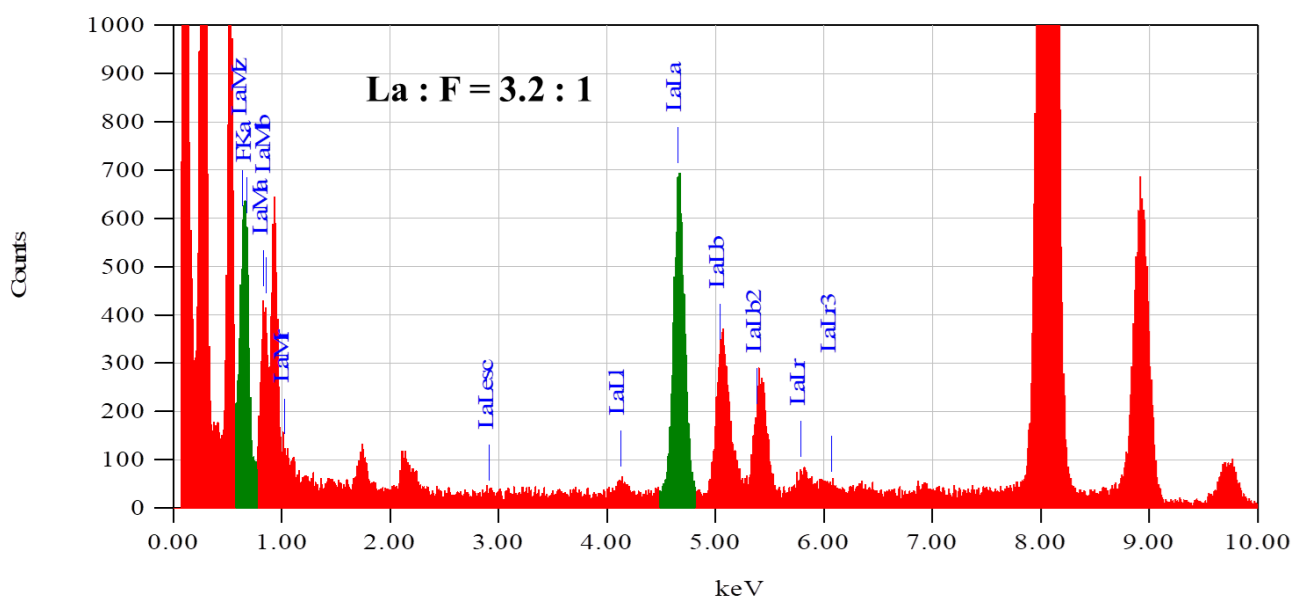

4

5

**Figure S4.** EDX pattern of Fv-LaF<sub>3</sub>-2 NSs.

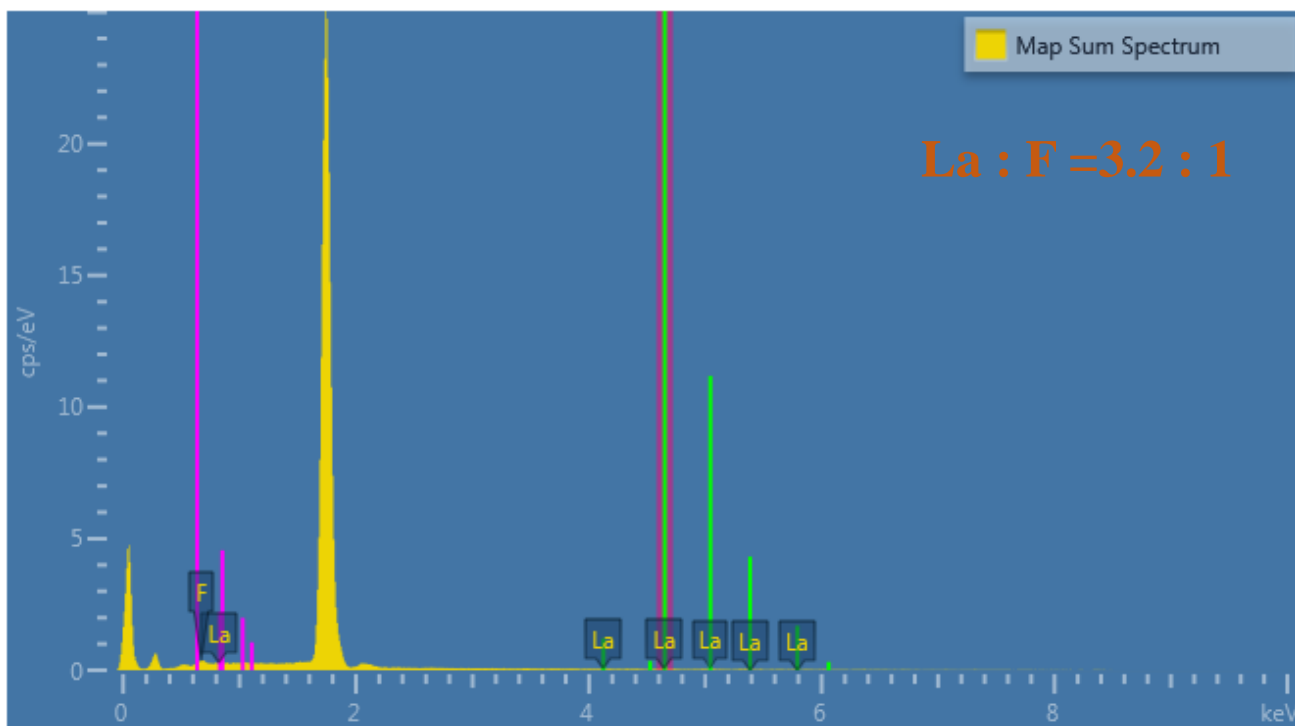

1  
2  
3

**Figure S5.** SEM EDX pattern of Fv-LaF<sub>3</sub>-2 NSs.

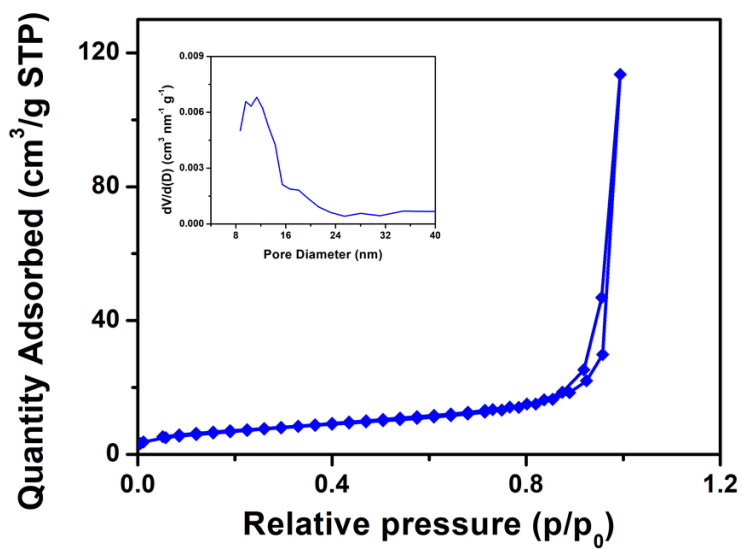

4  
5  
6

**Figure S6.** N<sub>2</sub> adsorption and desorption isotherm of Fv-LaF<sub>3</sub>-2 NSs (Insets: the corresponding pore distribution).

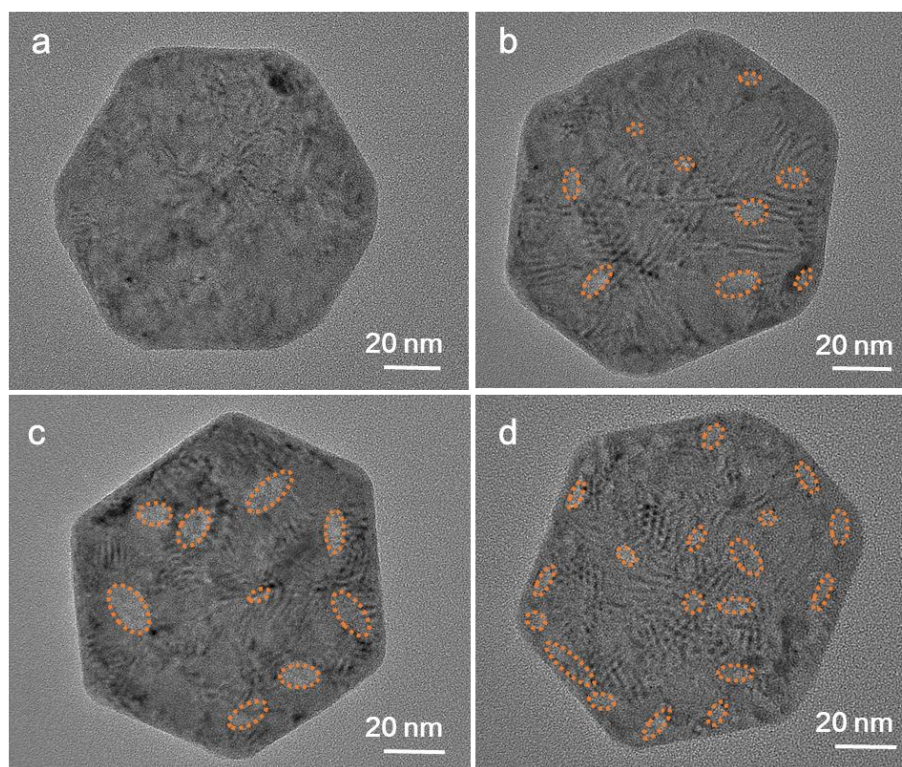

1

2 **Figure S7.** TEM images of (a) Fv-LaF<sub>3</sub>-0 NSs, (b) Fv-LaF<sub>3</sub>-1 NSs, (c) Fv-LaF<sub>3</sub>-2 NSs and (d)  
3 Fv-LaF<sub>3</sub>-3 NSs.

4

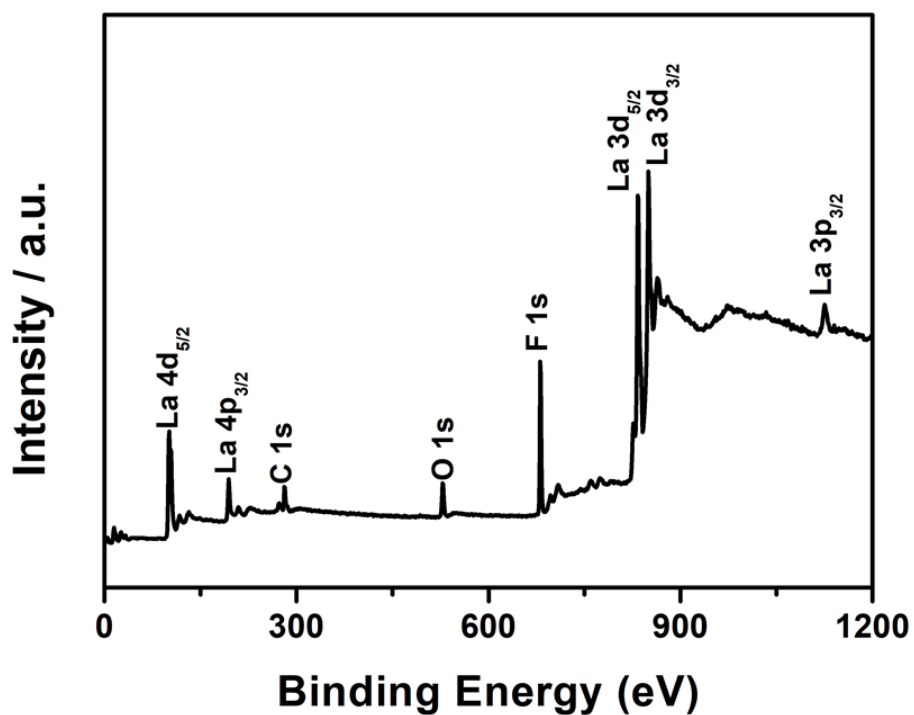

1  
2  
3

Figure S8. XPS survey spectrum of the Fv-LaF<sub>3</sub>-2 NSs.

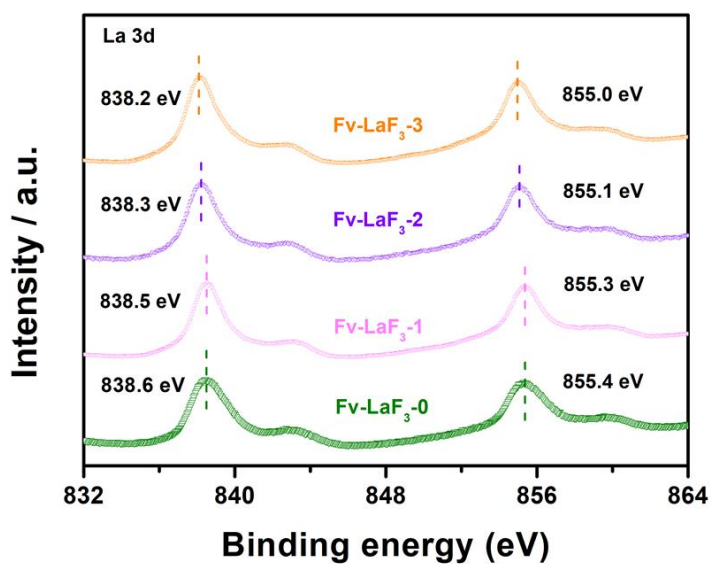

4  
5  
6

Figure S9. XPS spectra of the Fv-LaF<sub>3</sub>-x (x=0, 1, 2, 3) NSs: La 3d.

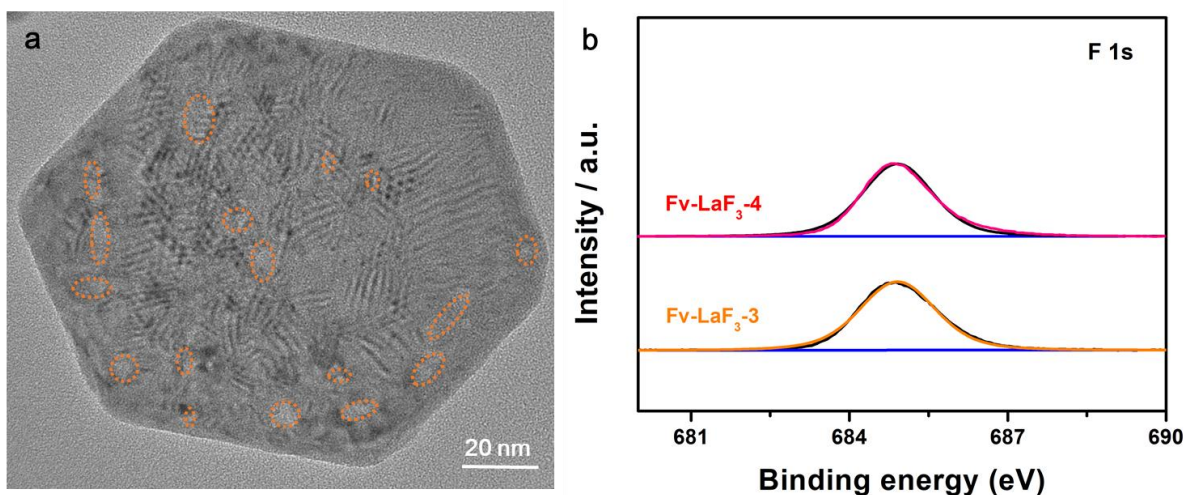

1

2 **Figure S10.** (a) TEM image of Fv-LaF<sub>3</sub>-4 NSs. (b) XPS spectra of Fv-LaF<sub>3</sub>-3 NSs and Fv-LaF<sub>3</sub>-4

3 NSs: F 1s.

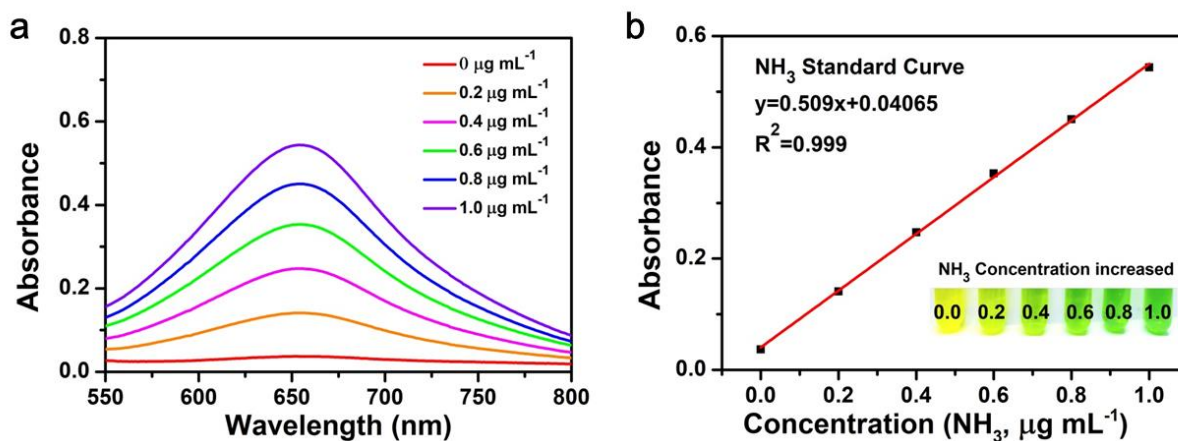

4

5 **Figure S11.** NH<sub>3</sub> quantification using indophenol blue method. (a) The UV-vis absorption spectra

6 and (b) corresponding calibration curves for the colorimetric NH<sub>3</sub> assay using the indophenol blue

7 method in 0.1 M Li<sub>2</sub>SO<sub>4</sub> solution.

8

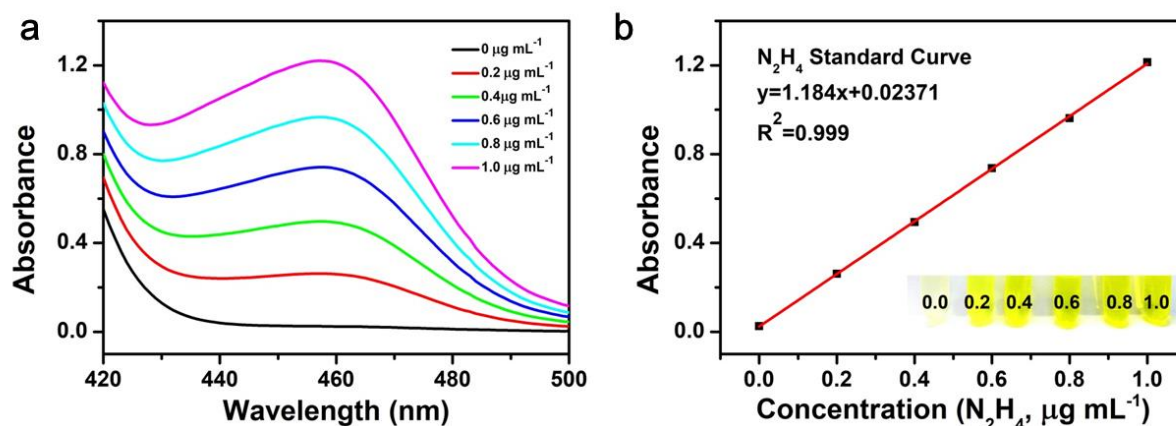

1  
2 **Figure S12.** (a) UV-vis absorption spectra of various  $N_2H_4$  concentration after incubated for 10 min  
3 at room temperate. (b) Calibration curve used for calculation of  $N_2H_4$  concentrations.

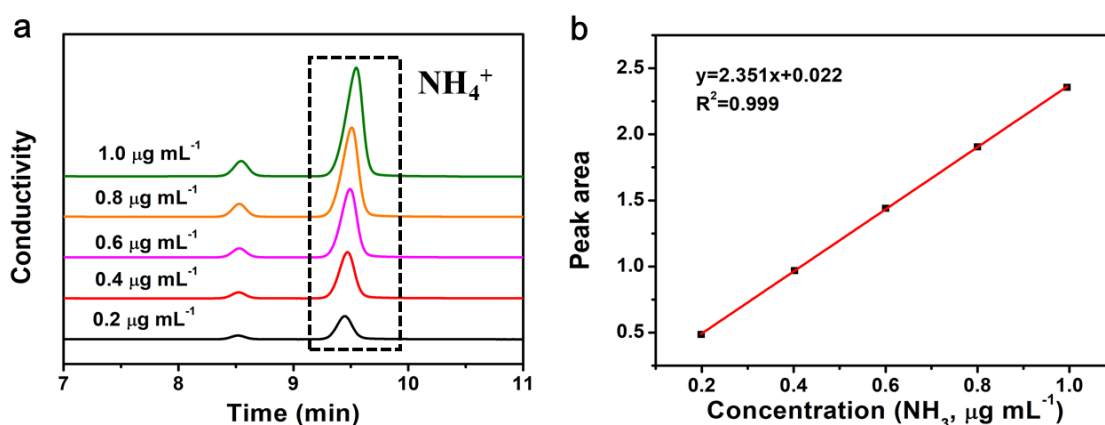

4  
5 **Figure S13.**  $NH_3$  quantification using IC method. (a) The IC and (b) corresponding calibration curve  
6 used for estimation of  $NH_4^+$ .

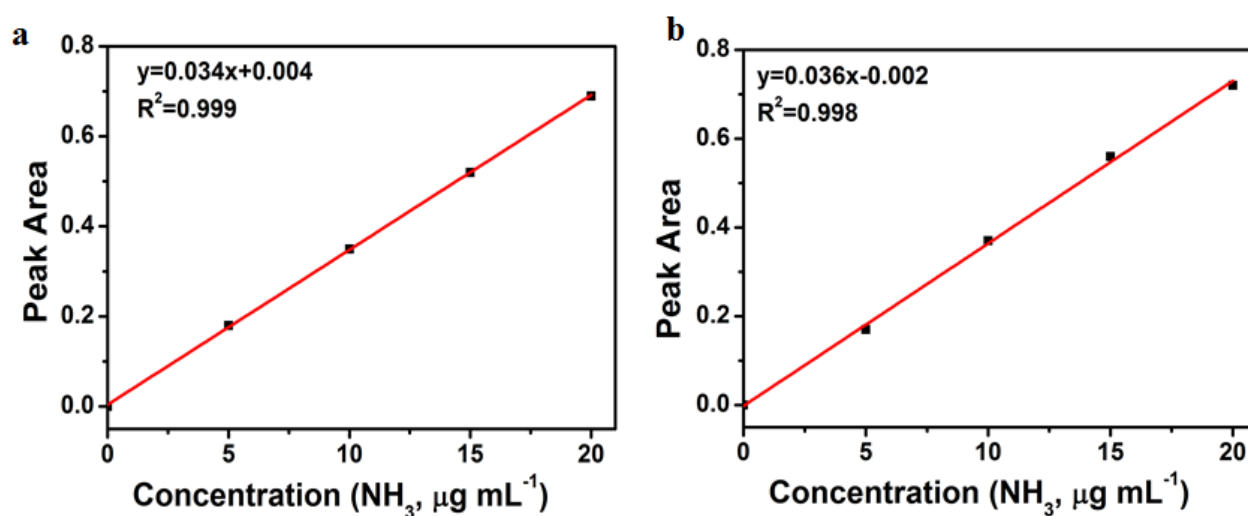

7  
8 **Figure S14.** The calibration  $^1H$ -NMR curves of produced (a) Calibration curve used for calculation  
9 of  $^{14}NH_4$  concentrations. (b) Calibration curve used for calculation of  $^{15}NH_4$  concentrations.

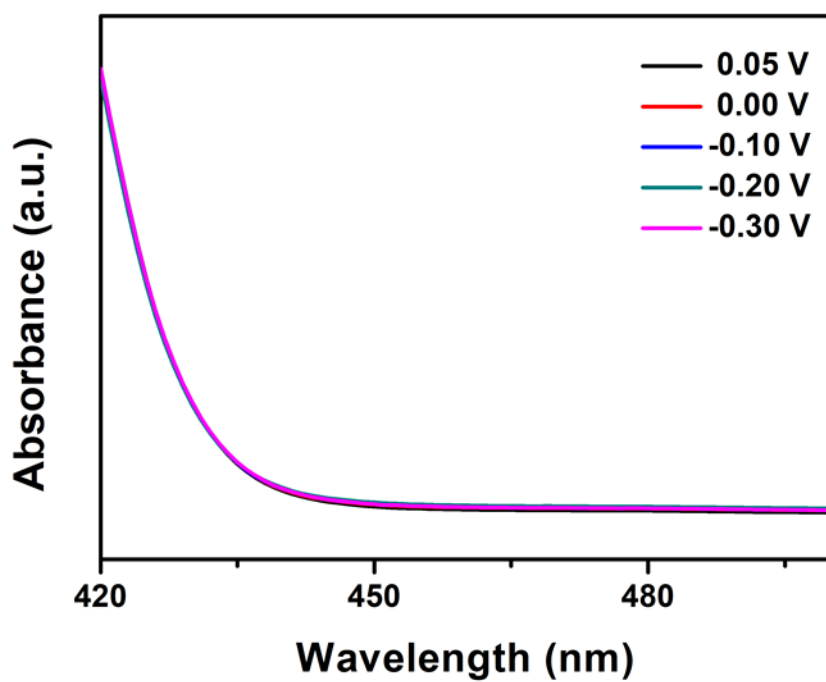

1

2 **Figure S15.** UV-vis absorption spectra of the electrolyte after electrolysis at different potentials.

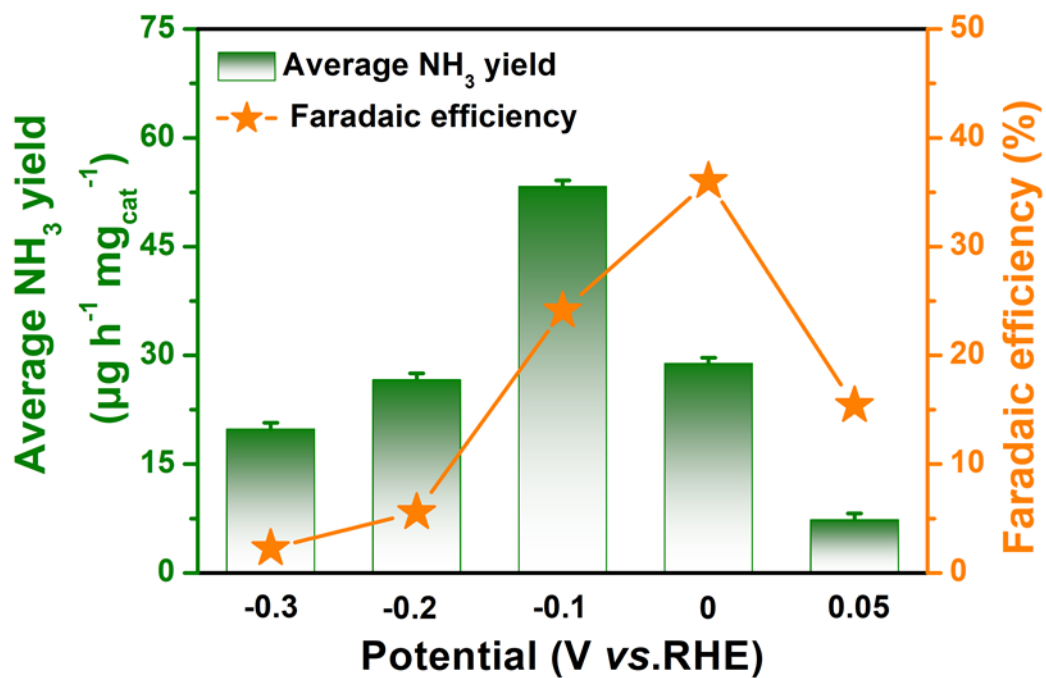

3

4 **Figure S16.** The FE and NH<sub>3</sub> yield rate of Fv-LaF<sub>3</sub>-2 NS/CP at different potentials.



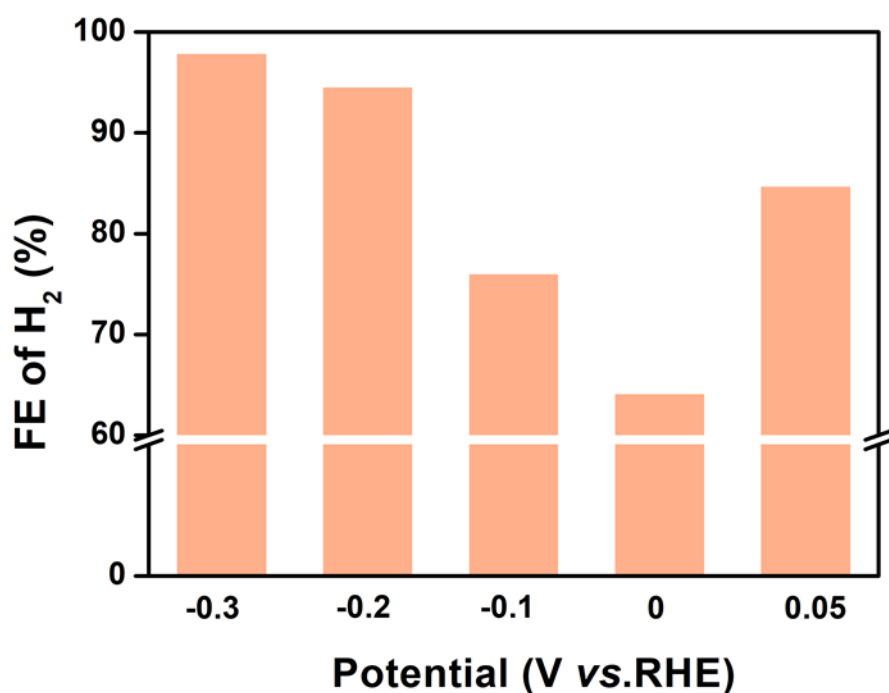

1

2 **Figure S17.** The FE of H<sub>2</sub> for Fv-LaF<sub>3</sub>-2 NSs/CP at given potentials in 0.1 M Li<sub>2</sub>SO<sub>4</sub> solution.

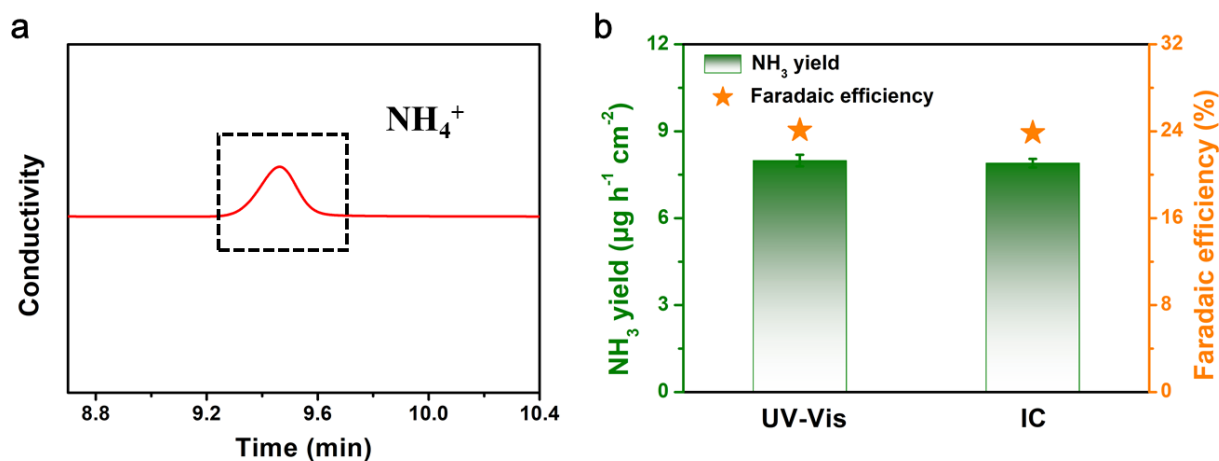

3

4 **Figure S18.** (a) IC result of Fv-LaF<sub>3</sub>-2 NSs in 0.1 M Li<sub>2</sub>SO<sub>4</sub> electrolyte after 1 h electrolysis under  
 5 N<sub>2</sub> at -0.10 V vs. RHE. (b) Comparison chart of UV-vis absorption spectra and ion chromatography  
 6 method for NH<sub>3</sub> yield of Fv-LaF<sub>3</sub>-2 NSs in 0.1 M Li<sub>2</sub>SO<sub>4</sub> electrolyte after 1 h electrolysis under N<sub>2</sub> at  
 7 -0.10 V vs. RHE.

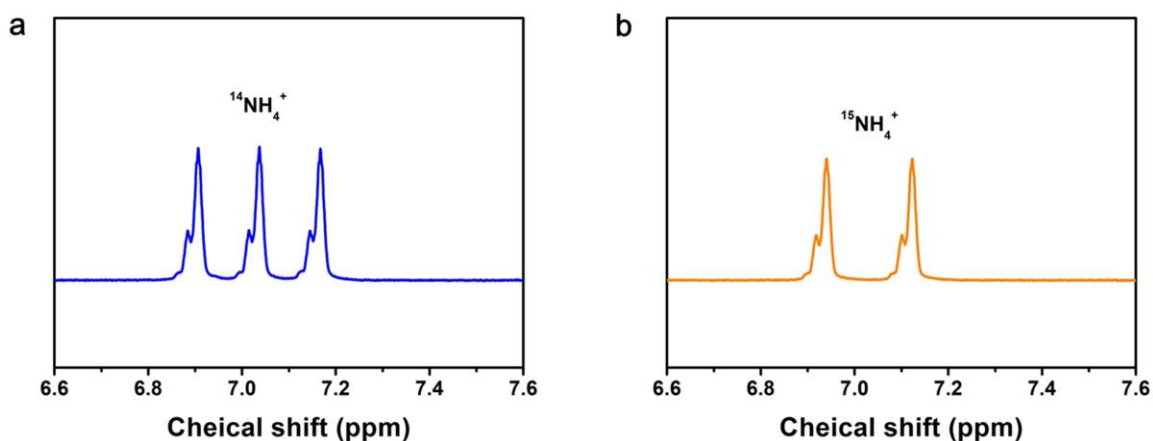

1

2 **Figure S19.** <sup>15</sup>N isotope labeling experiment of Fv-LaF<sub>3</sub>-2 NSs. The <sup>1</sup>H-NMR spectrum of  
 3 electrolysis in (a) <sup>14</sup>N<sub>2</sub>-saturated and (b) <sup>15</sup>N<sub>2</sub>-saturated 0.1 M Li<sub>2</sub>SO<sub>4</sub> electrolyte.

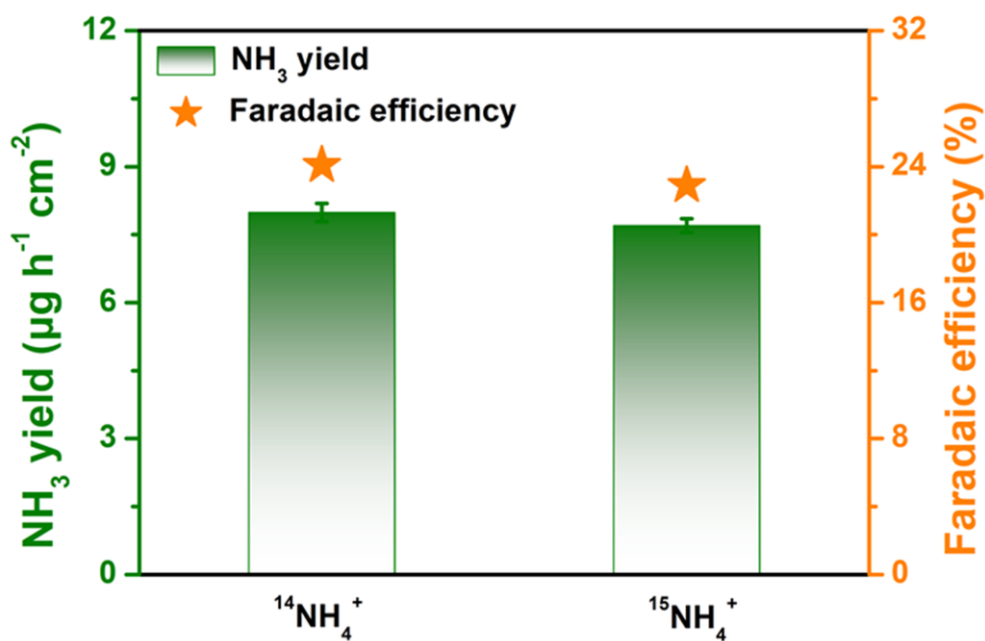

4

5 **Figure S20.** The NH<sub>3</sub> yield rate and FE of Fv-LaF<sub>3</sub>-2 NSs at -0.10 V vs. RHE detected by <sup>1</sup>H NMR.

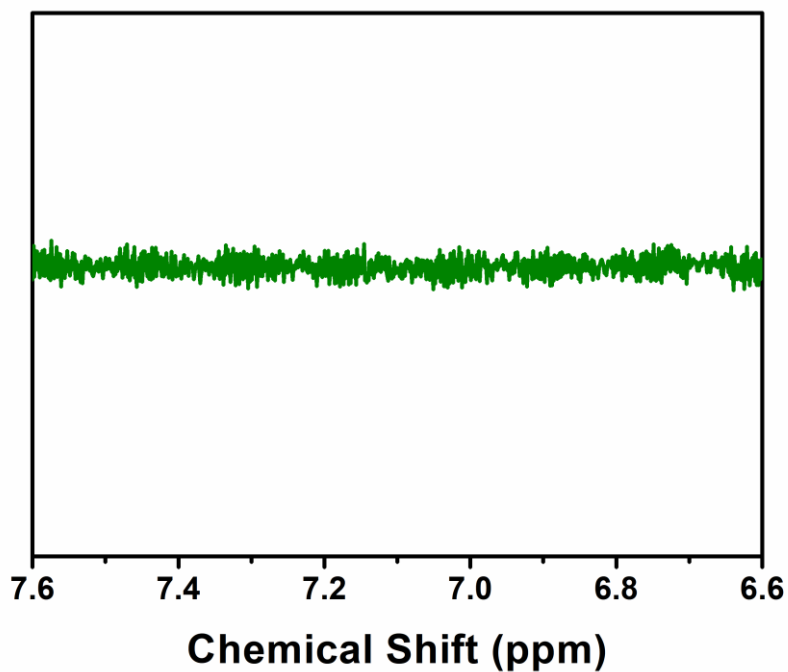

1

2 **Figure S21.** The  $^1\text{H-NMR}$  characterization in Ar-saturated  $\text{Li}_2\text{SO}_4$  solution.

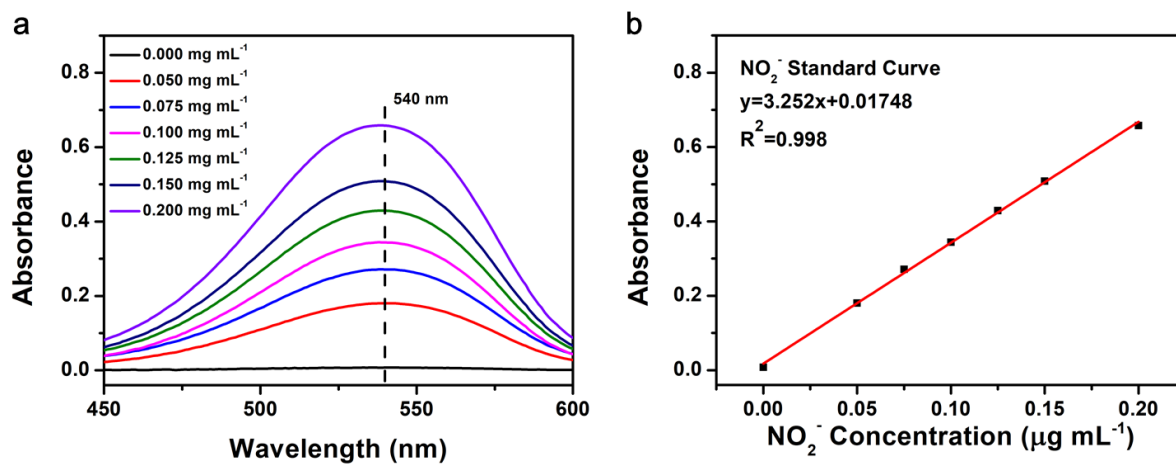

3

4 **Figure S22.** (a) UV-vis absorption spectra of various  $\text{NO}_2^-$  concentrations after incubated for 30 min  
 5 at room temperature and (b) calibration curve used for estimation of  $\text{NO}_2^-$ .

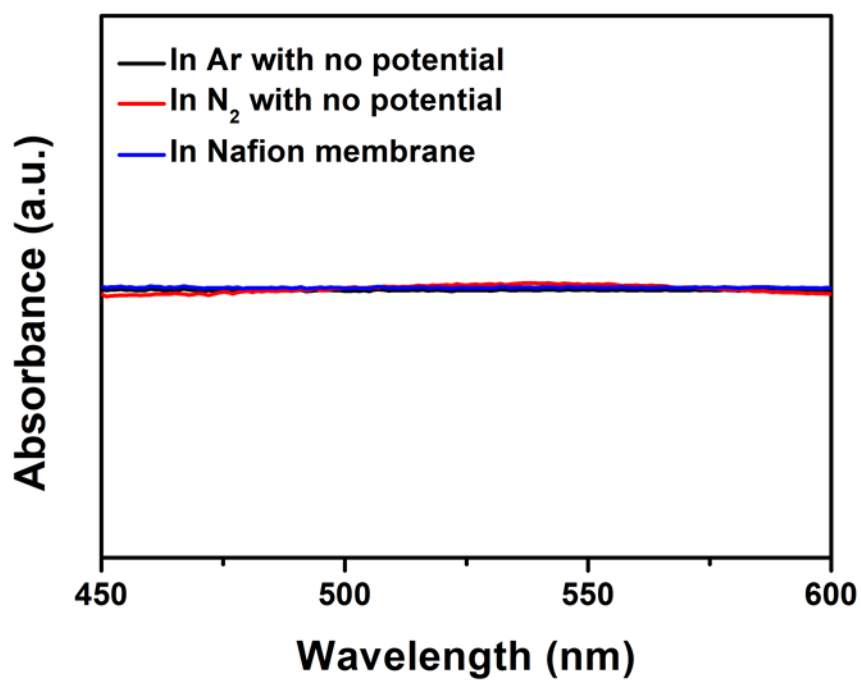

1

2 **Figure S23.** UV-vis absorption spectra of the electrolyte at different conditions (Black line for  
3 continuous Ar bubbling experiments with no potential applied without Fv-LaF<sub>3</sub>-2 NSs; red line for  
4 continuous N<sub>2</sub> bubbling experiments with no potential applied without Fv-LaF<sub>3</sub>-2 NSs; blue line for  
5 Nafion membrane in the cell, respectively.).

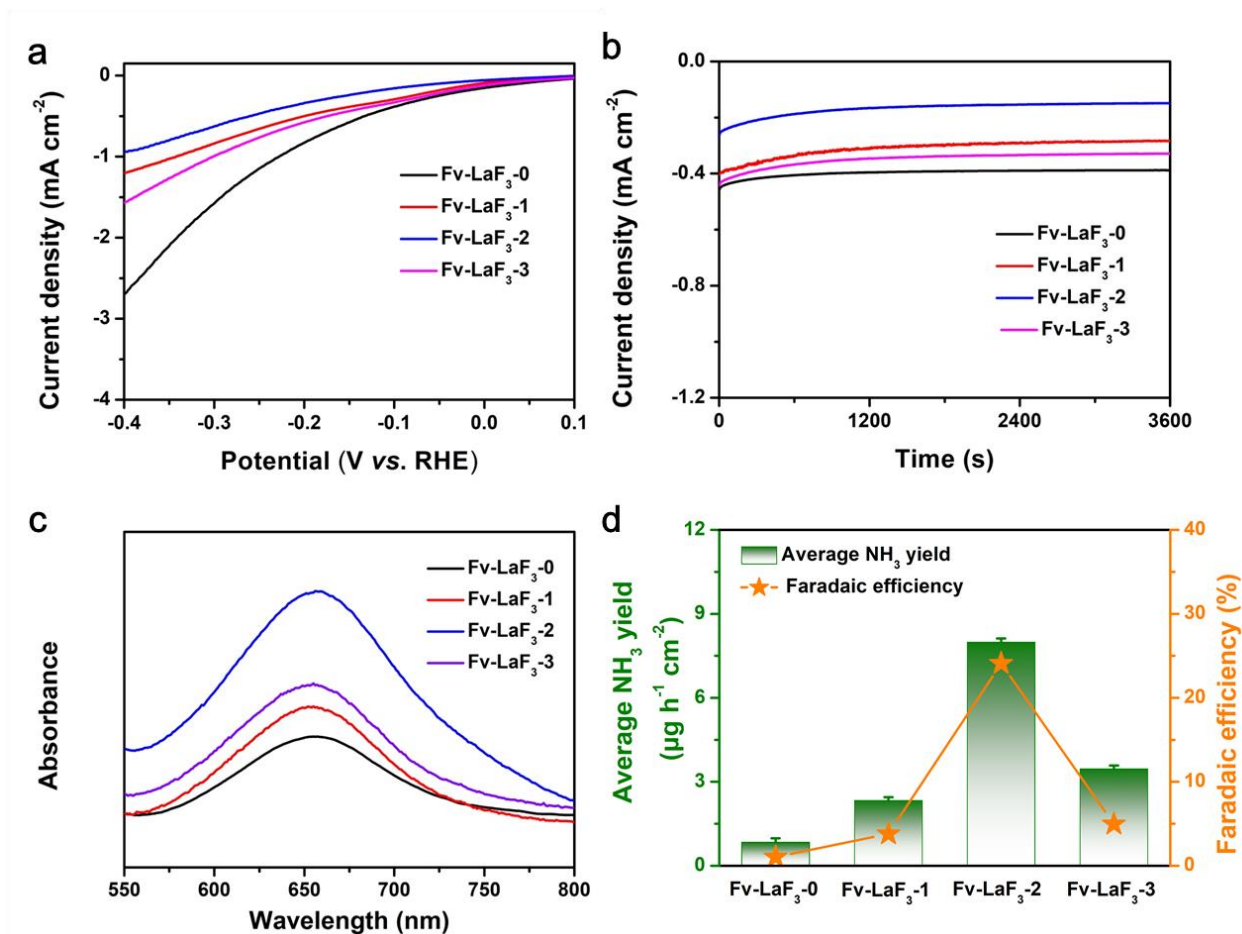

1

2 **Figure S24.** NRR performance of of Fv-LaF<sub>3-x</sub> (x=0, 1, 2, 3) NSs. (a) LSV curves of Fv-LaF<sub>3-x</sub>  
 3 (x=0, 1, 2, 3) NSs in Ar- and N<sub>2</sub>-saturated 0.1 M Li<sub>2</sub>SO<sub>4</sub> with a scan rate of 10 mV s<sup>-1</sup>. (b) The  
 4 current-time dependent current density curves of Fv-LaF<sub>3-x</sub> (x=0, 1, 2, 3) NSs at -0.10 V vs. RHE. (c)  
 5 The UV-vis absorption spectra of electrolyte after electrolysis at -0.10 V vs. RHE. (d) The FE and  
 6 NH<sub>3</sub> yield rate of Fv-LaF<sub>3-x</sub> (x=0, 1, 2, 3) NSs at -0.10 V vs. RHE.

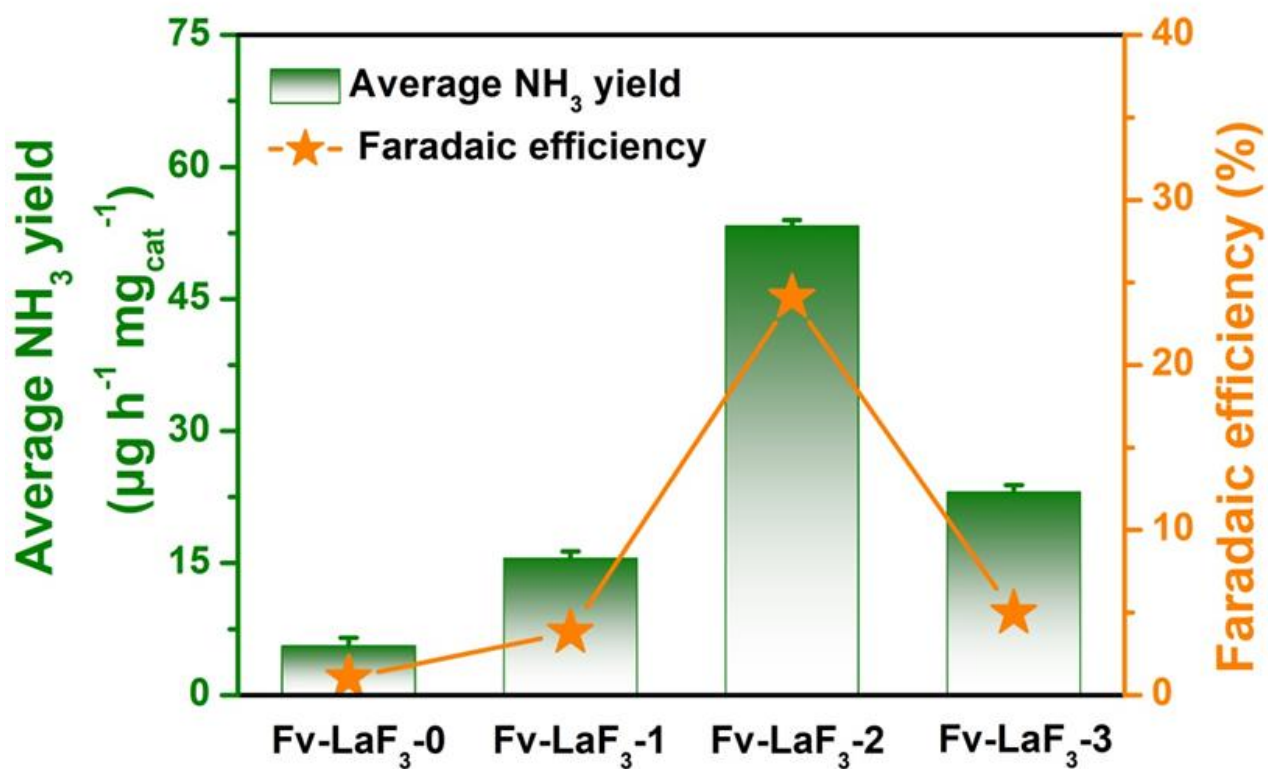

1

2 **Figure S25.** The FE and NH<sub>3</sub> yield rate of Fv-LaF<sub>3</sub>-x (x=0, 1, 2, 3) NSs at -0.10 V vs. RHE.

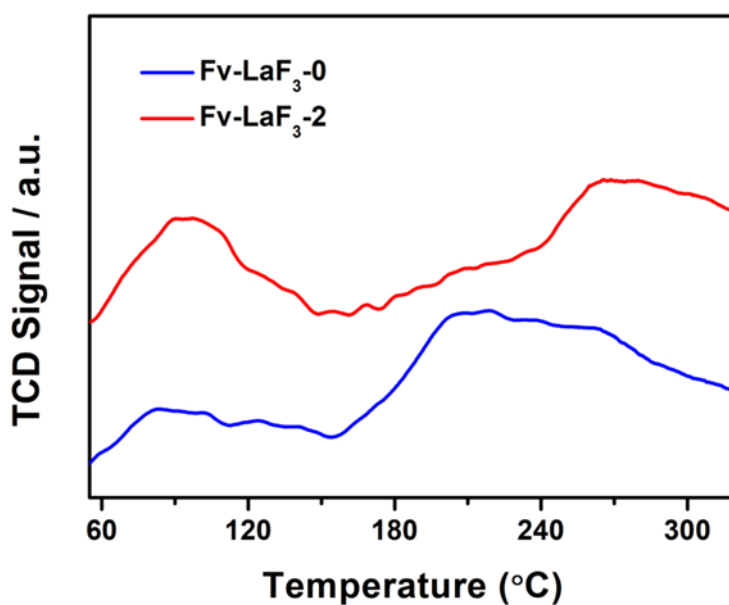

3

4

**Figure S26.** (a) N<sub>2</sub>-TPD of Fv-LaF<sub>3</sub>-0 NSs and Fv-LaF<sub>3</sub>-2 NSs.

5

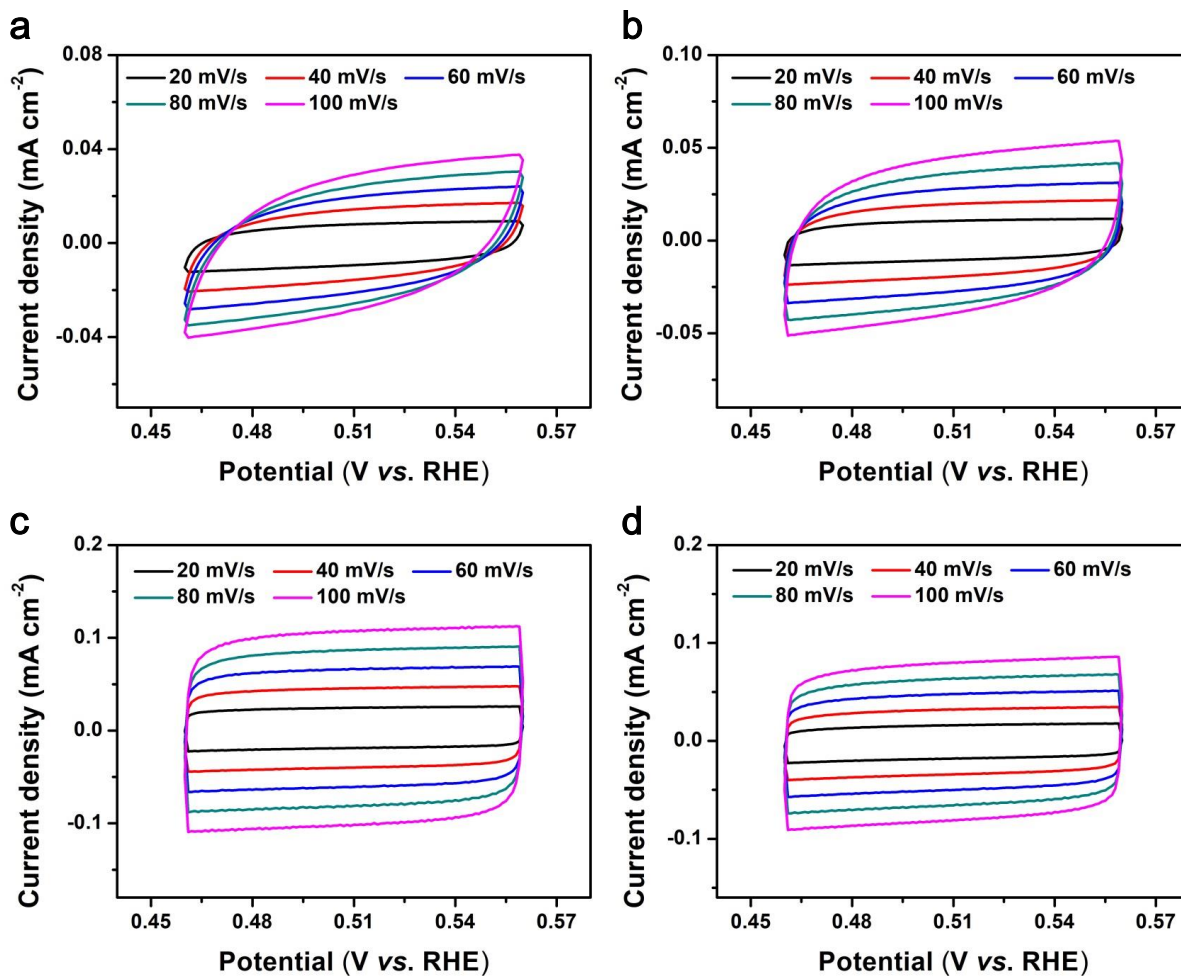

1  
2  
3  
4

**Figure S27.** Cyclic voltammograms for (a) Fv-LaF<sub>3</sub>-0 NSs, (b) Fv-LaF<sub>3</sub>-1 NSs, (c) Fv-LaF<sub>3</sub>-2 NSs and (d) Fv-LaF<sub>3</sub>-3 NSs at scan rates of 20, 40, 60, 80 and 100 mV s<sup>-1</sup>.

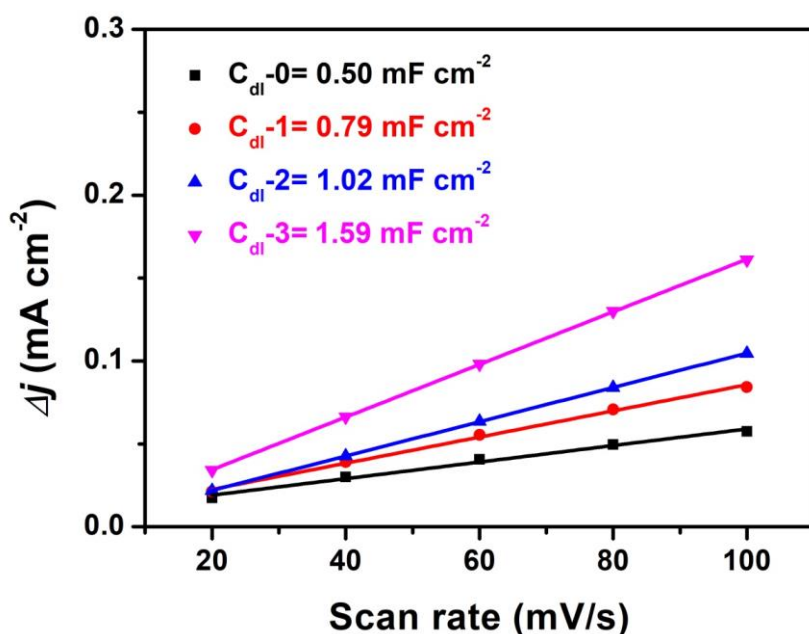

1  
2 **Figure S28.** The capacitive currents at 0.51 V vs. RHE as a function of scan rate for Fv-LaF<sub>3-x</sub> (x =  
3 0, 1, 2, 3) NSs at scan rates of 20, 40, 60, 80 and 100 mV s<sup>-1</sup>.

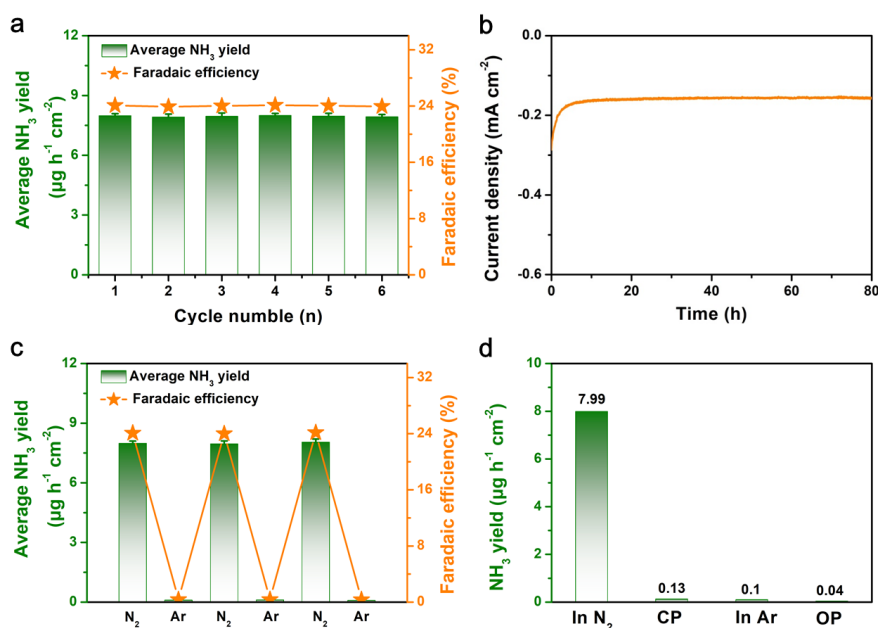

4  
5 **Figure S29.** (a) NH<sub>3</sub> yields and corresponding FEs of Fv-LaF<sub>3-2</sub> NSs/CP at -0.10 V vs. RHE in  
6 N<sub>2</sub>-saturated solutions during different cycles for 6 times. (b) The current-time curves at -0.10 V vs.  
7 RHE. (c) The FE and NH<sub>3</sub> yield rate at -0.10 V vs. RHE with alternating Ar-saturated and  
8 N<sub>2</sub>-saturated electrolytes at the interval of 2 h cycles. (d) The NH<sub>3</sub> production at -0.10 V vs. RHE  
9 under different conditions.



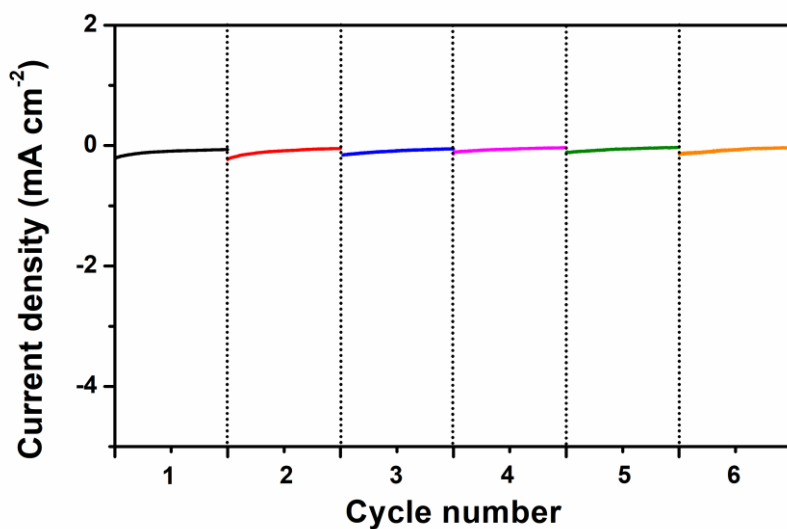

1

2 **Figure S30.** Time-dependent current density curves of Fv-LaF<sub>3</sub>-2 nanosheets with 1 h for each cycle  
 3 in N<sub>2</sub>-saturated 0.1 M Li<sub>2</sub>SO<sub>4</sub> solution.

4

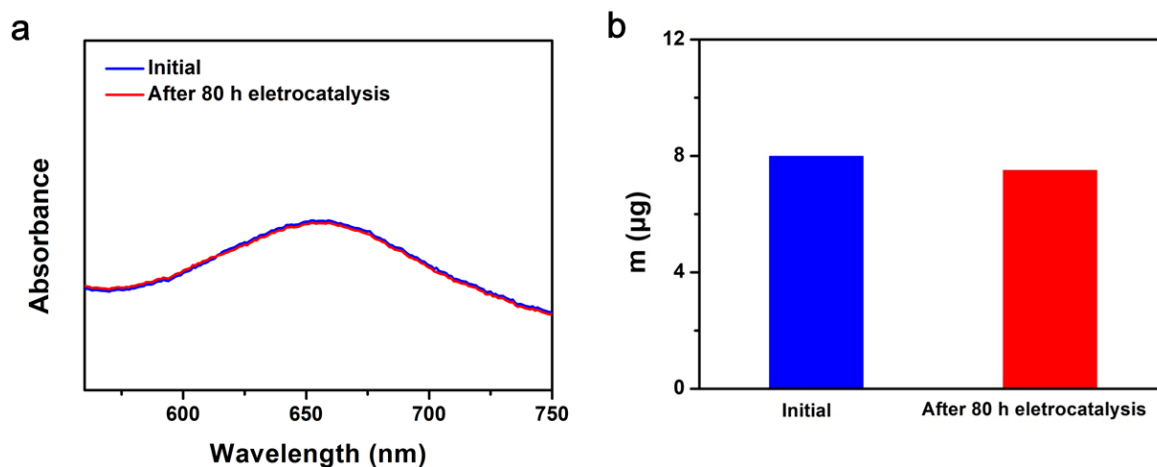

5

6 **Figure S31.** (a) UV-vis absorption spectra of the electrolyte stained with indophenol indicator after  
 7 electrolysis at -0.10 V vs. RHE for 1 h over initial Fv-LaF<sub>3</sub>-2 NSs/CP and Fv-LaF<sub>3</sub>-2 NSs/CP  
 8 subjected to 80 h. (b) Amount of NH<sub>3</sub> generated after 1 h electrolysis over initial Fv-LaF<sub>3</sub>-2 NSs/CP  
 9 and Fv-LaF<sub>3</sub>-2 NSs/CP subjected to 80 h.

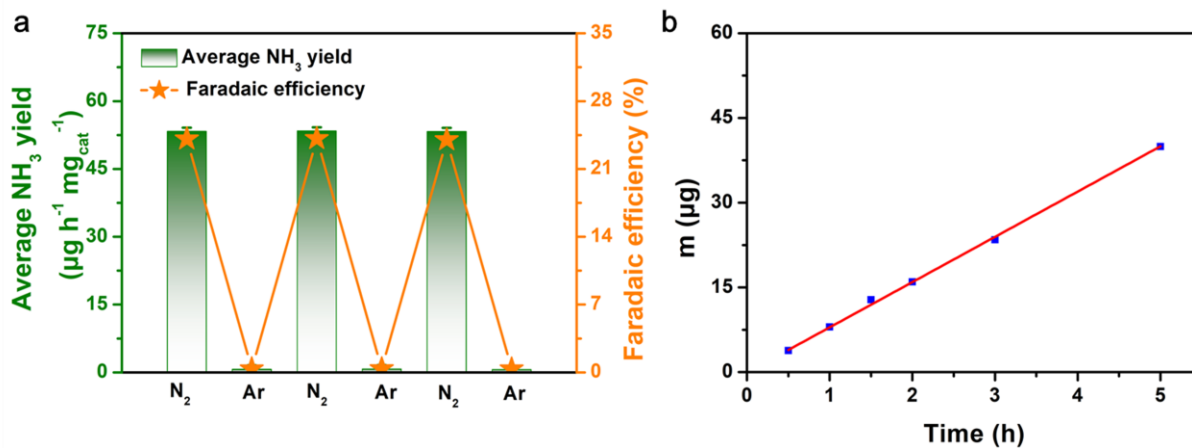

1  
 2 **Figure S32.** (a) NH<sub>3</sub> yields and corresponding FEs of Fv-LaF<sub>3</sub>-2 NSs/CP with alternating 1 h cycles  
 3 at -0.10 V *vs.* RHE between Ar- and N<sub>2</sub>-saturated solutions. (b) The curve of NH<sub>3</sub> production *vs.*  
 4 reaction time at -0.10 V *vs.* RHE.

5

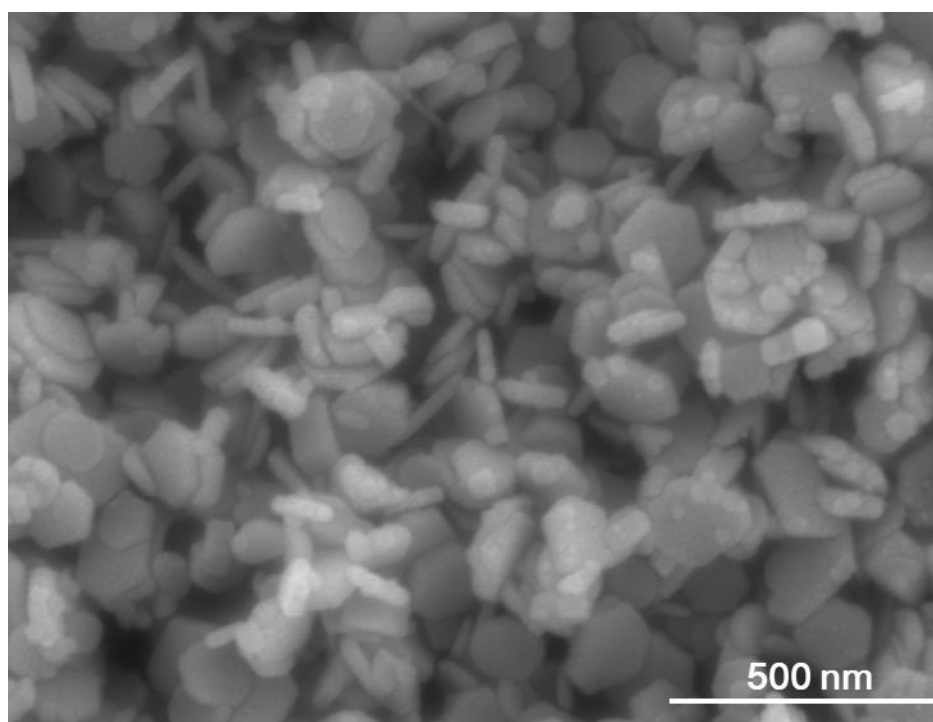

6

7

**Figure S33.** SEM image of Fv-LaF<sub>3</sub>-2 NSs after stability test.

8

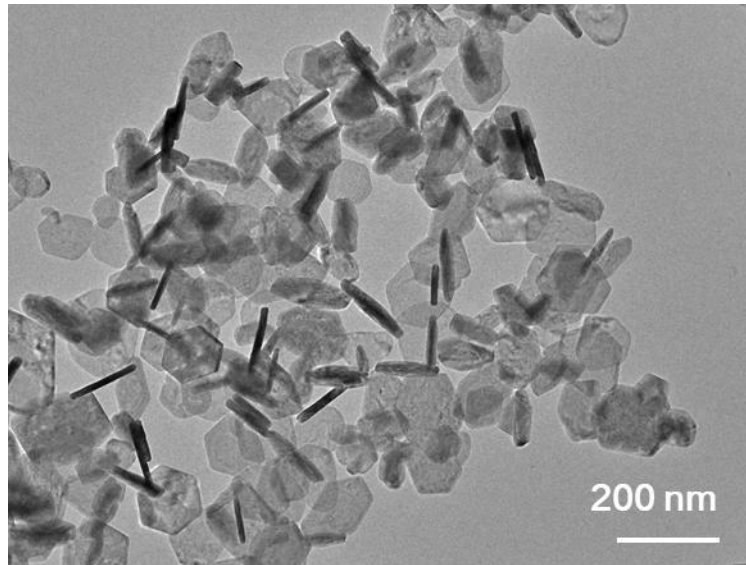

**Figure S34.** TEM image of Fv-LaF<sub>3</sub>-2 NSs after stability test.

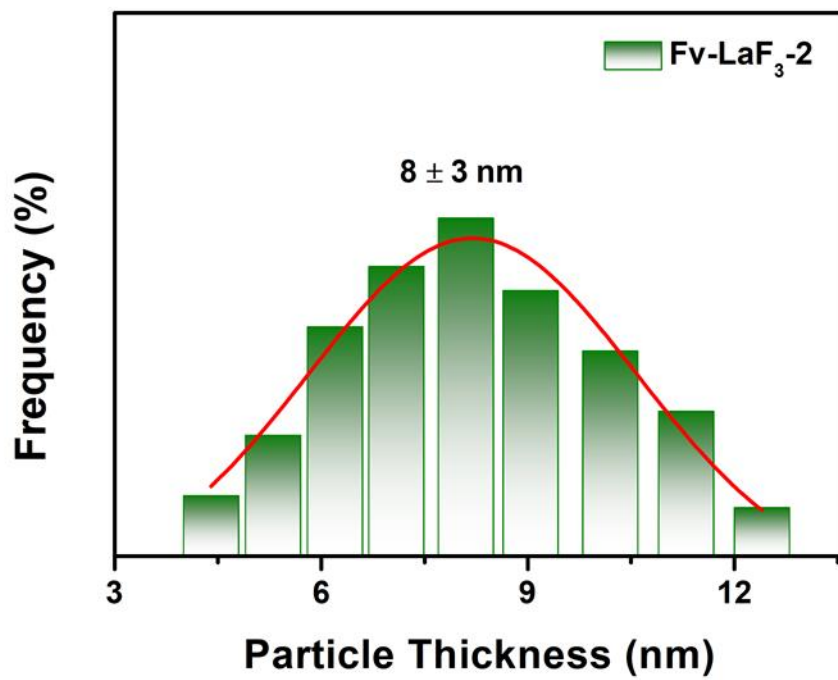

**Figure S35.** Particle thickness of Fv-LaF<sub>3</sub>-2 NSs after stability test.

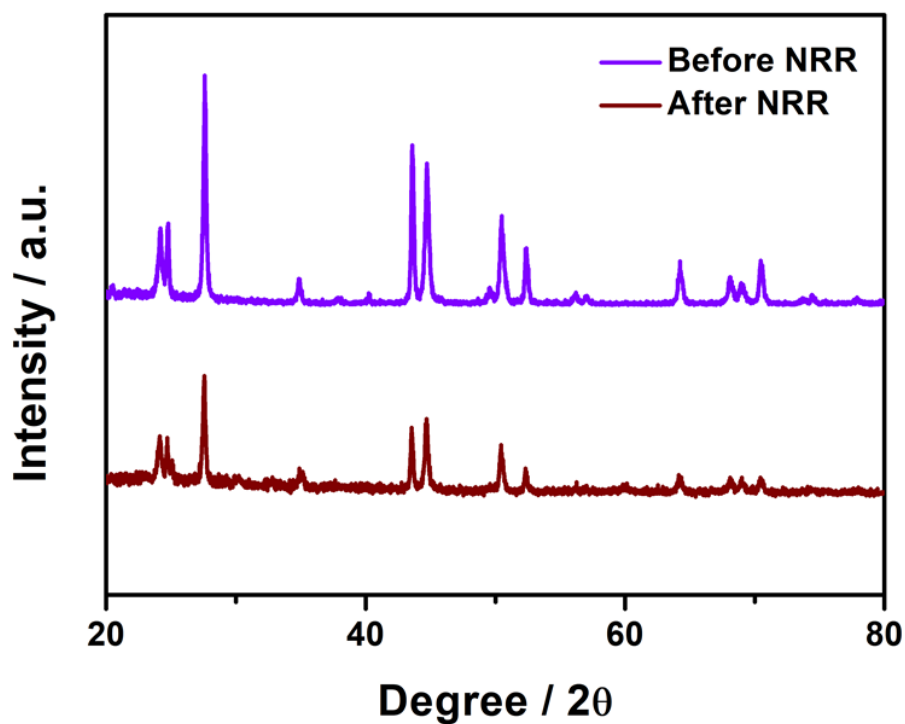

Figure S36. XRD image of Fv-LaF<sub>3</sub>-2 NSs before and after stability test.

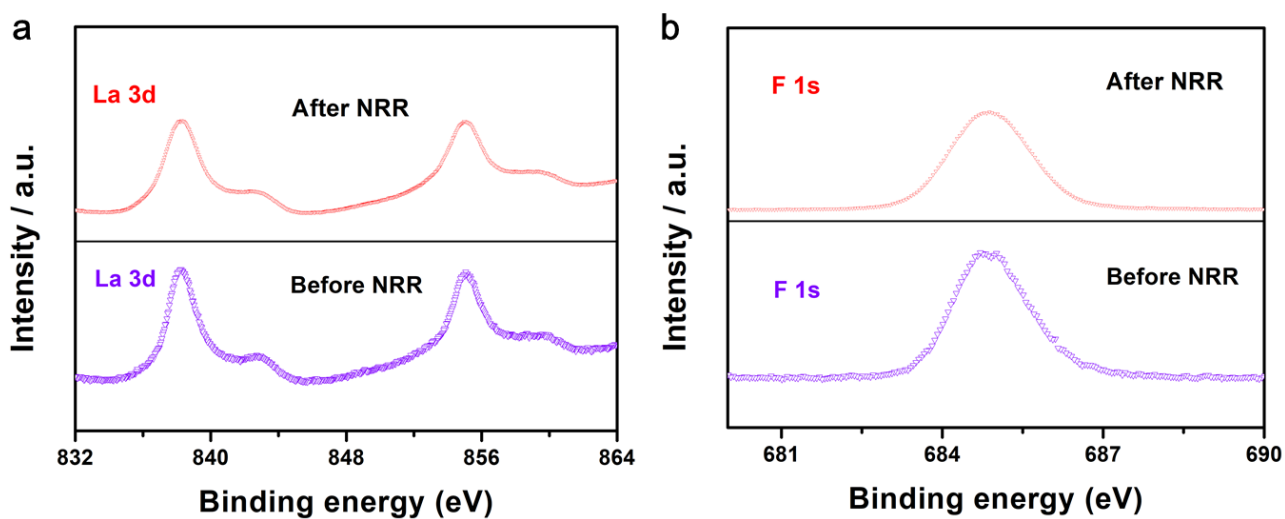

Figure S37. XPS spectras of the Fv-LaF<sub>3</sub>-2 NSs (a) La 3d and (b) F 1s before and after stability test.

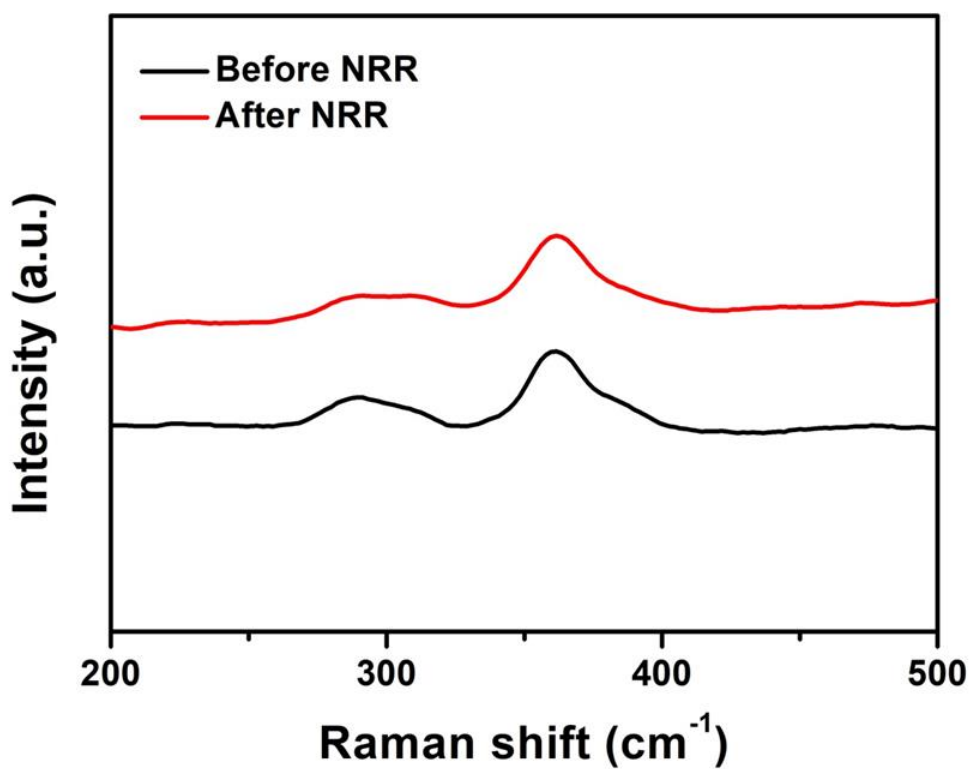

1  
2 **Figure S38.** Raman spectra of Fv-LaF<sub>3</sub>-2 NSs before and after stability test.

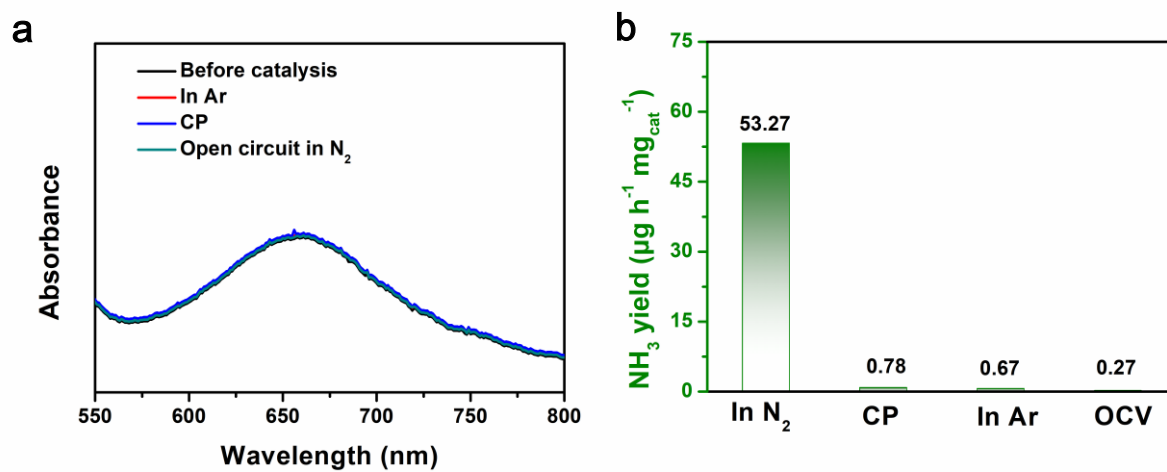

4  
5 **Figure S39.** (a) The UV-vis absorption curves of Fv-LaF<sub>3</sub>-2 NSs under different conditions. (b) The  
6 NH<sub>3</sub> yields under different conditions.

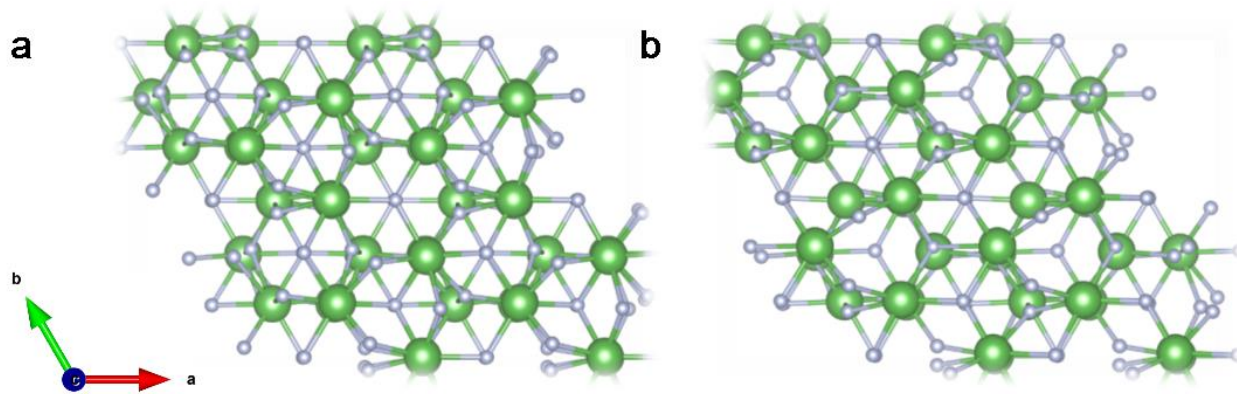

1

2 **Figure S40.** Optimized structure the N<sub>2</sub>-adsorbed configuration on Fv-LaF<sub>3-0</sub> NSs surface (a),  
 3 Fv-LaF<sub>3-2</sub> NSs surface (b), respectively. Gree and cyan balls represent La and F, respectively.

4

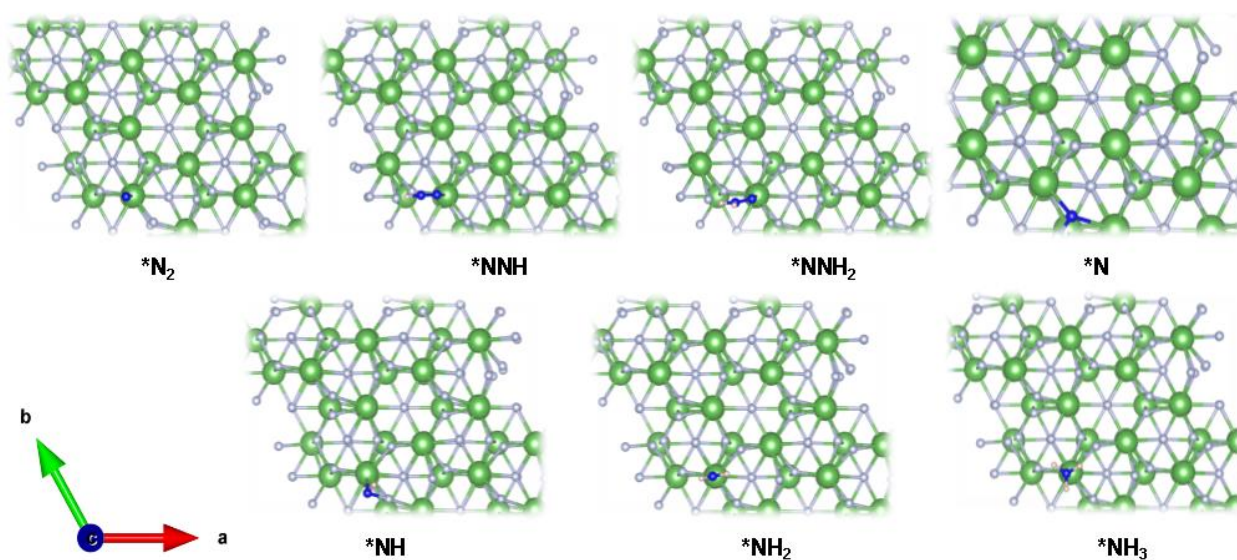

5

6 **Figure S41.** The optimized geometries of reaction intermediates for N<sub>2</sub> reduction on Fv-LaF<sub>3-0</sub> NSs.  
 7 Gree, cyan, blue and pink balls represent La, F, N and H atoms, respectively.

8

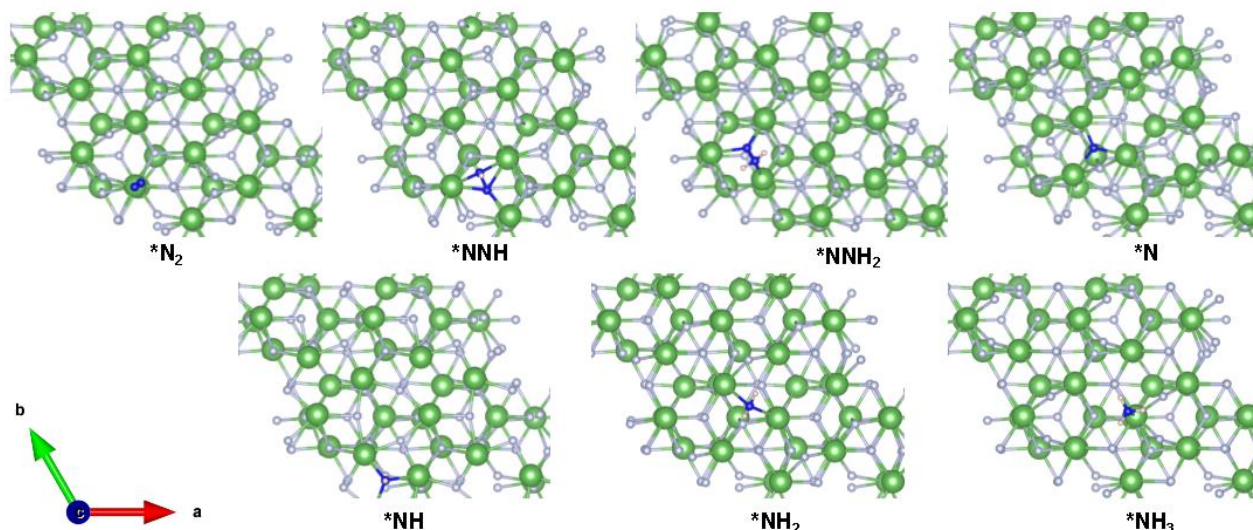

1

2 **Figure S42.** The optimized geometries of reaction intermediates for  $N_2$  reduction on Fv- $LaF_3$ -2 NSs.

3 Gree, cyan, blue and pink balls represent La, F, N and H atoms, respectively.

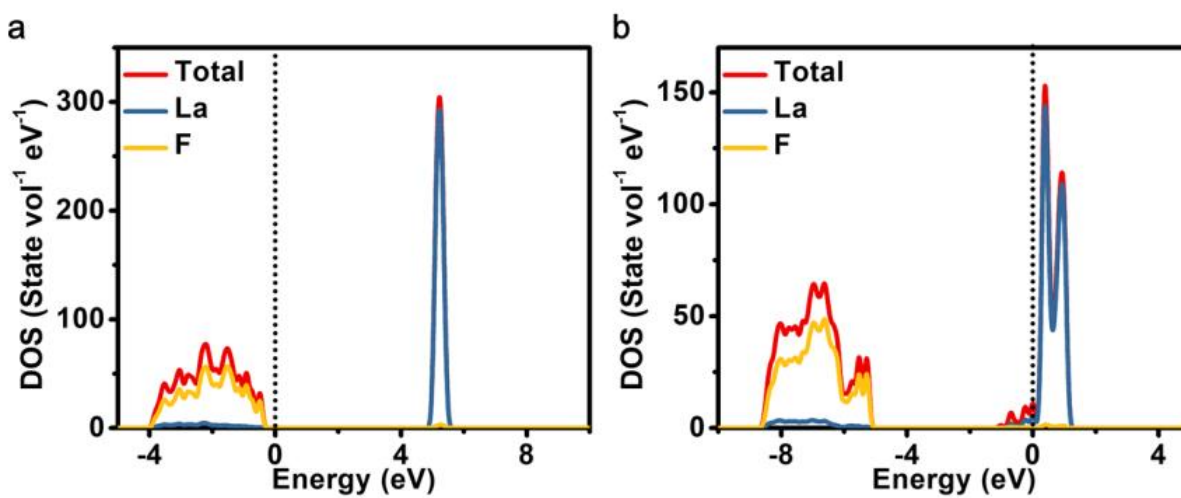

4

5 **Figure S43.** (a) DOS for Fv- $LaF_3$ -0 NSs and Fv- $LaF_3$ -2 NSs (the Fermi level is set at 0 eV).

6

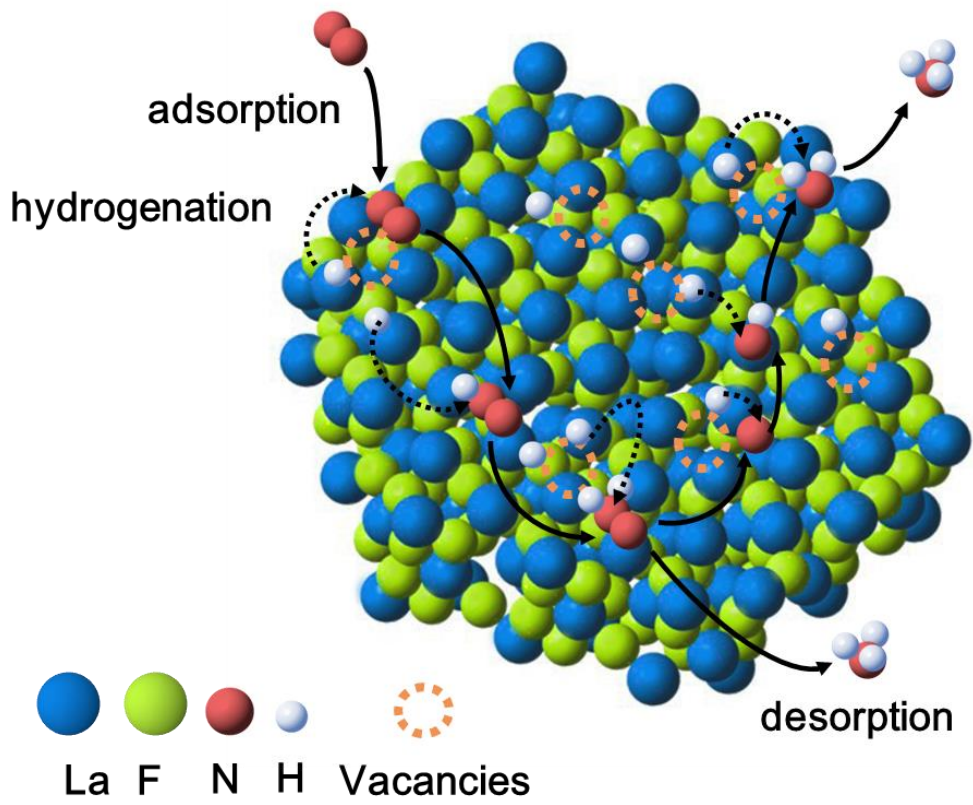

1

2 **Figure S44.** Concise mechanism of  $N_2$  fixation on the surface of Fv-LaF<sub>3</sub>-2 NSs.

3



1 **Table S1.** The mass ratio of fluorine and lanthanum in LaF<sub>3</sub> NSs with different reduction times  
2 obtained by XPS.

|    | Fv-LaF <sub>3</sub> -0 | Fv-LaF <sub>3</sub> -1 | Fv-LaF <sub>3</sub> -2 | Fv-LaF <sub>3</sub> -3 | Fv-LaF <sub>3</sub> -4 |
|----|------------------------|------------------------|------------------------|------------------------|------------------------|
| La | 72.99                  | 75.32                  | 75.95                  | 76.25                  | 76.31                  |
| F  | 27.01                  | 24.68                  | 24.05                  | 23.75                  | 23.69                  |

3

4 **Table S2.** Relative Gibbs free energies (in eV) for the different states along NRR mechanism at  
5 standard conditions (298.15 K).

|        |      | N <sub>2</sub> * | NNH*  | NNH <sub>2</sub> * | N*    | NH*   | NH <sub>2</sub> * | NH <sub>3</sub> * | NH <sub>3</sub> (g) |
|--------|------|------------------|-------|--------------------|-------|-------|-------------------|-------------------|---------------------|
|        | 0    | 1                | 2     | 3                  | 4     | 5     | 6                 | 7                 | 8                   |
| free   | 0.00 | -0.09            | 2.01  | 1.49               | 3.29  | 2.62  | 0.67              | -2.79             | -2.15               |
| defect | 0.00 | -0.17            | -3.17 | -2.61              | -4.09 | -4.09 | -3.57             | -2.76             | -2.15               |

6

7

8

9

10

11

12

13

14

15

16

17

18

19

20

21

22

1

**Table S3.** Summary of the representative reports on artificially N<sub>2</sub> fixation.

| Catalyst                          | Electrolyte                              | Potential<br>(V vs. RHE) | NH <sub>3</sub> Yield                                                                                   | FE<br>(%) | References |
|-----------------------------------|------------------------------------------|--------------------------|---------------------------------------------------------------------------------------------------------|-----------|------------|
| Fv-LaF <sub>3</sub> -2 NSs        | 0.1 M<br>Li <sub>2</sub> SO <sub>4</sub> | -0.10                    | 7.99 μg cm <sup>-2</sup> h <sup>-1</sup> (53.27 μg<br>mg <sup>-1</sup> <sub>cat</sub> h <sup>-1</sup> ) | 24.09     | This work  |
| γ-Fe <sub>2</sub> O <sub>3</sub>  | 0.1 M KOH                                | 0                        | 0.21 μg cm <sup>-2</sup> h <sup>-1</sup>                                                                | 1.9       | 4          |
| NiCoS/C                           | 0.1 M<br>Li <sub>2</sub> SO <sub>4</sub> | 0                        | 26.0 μg mg <sup>-1</sup> h <sup>-1</sup>                                                                | 12.9      | 5          |
| CoP                               | 1.0 M KOH                                | 0                        | 2.48 μg mg <sup>-1</sup> <sub>cat</sub> h <sup>-1</sup>                                                 | 7.36      | 6          |
| Fe <sub>SA</sub> -N-C             | 0.1 M KOH                                | 0                        | 7.48 μg mg <sup>-1</sup> <sub>cat</sub> h <sup>-1</sup>                                                 | 56.55     | 7          |
| PC/Sb/SbPO <sub>4</sub>           | 0.1 M HCl                                | -0.05                    | 3.5 μg mg <sup>-1</sup> <sub>cat</sub> h <sup>-1</sup>                                                  | 6.2       | 8          |
| Mo <sup>0</sup> /GDY              | 0.1 M HCl                                | -0.05                    | 0.55 μg mg <sup>-1</sup> <sub>cat</sub> h <sup>-1</sup>                                                 | 7.0       | 9          |
| Mo <sub>2</sub> N@Ti              | 0.1 M HCl                                | -0.05                    | 2.73 μg mg <sub>cat</sub> <sup>-1</sup> h <sup>-1</sup>                                                 | 28.4      | 10         |
| Ti <sub>3</sub> C <sub>2</sub>    | 0.1 M KOH                                | -0.1                     | 0.5 μg cm <sup>-2</sup> h <sup>-1</sup>                                                                 | 21.3      | 11         |
| MoS <sub>2</sub>                  | 0.1 M KOH                                | -0.1                     | 8.35 μg cm <sup>-2</sup> h <sup>-1</sup>                                                                | 16.1      | 12         |
| NV-W <sub>2</sub> N <sub>3</sub>  | 0.1 M KOH                                | -0.1                     | 0.94 μg cm <sup>-2</sup> h <sup>-1</sup>                                                                | 10.1      | 13         |
| MoSAs-Mo <sub>2</sub> C/NC<br>NTs | 0.1 M PBS                                | -0.15                    | 5.8 μg cm <sup>-2</sup> h <sup>-1</sup>                                                                 | 8.9       | 14         |
| CN/C <sub>500</sub>               | 0.1 M HCl                                | -0.1                     | 0.4 μg mg <sup>-1</sup> <sub>cat</sub> h <sup>-1</sup>                                                  | 16.8      | 15         |
| Mo <sub>3</sub> Fe <sub>3</sub> C | 0.1 M<br>Li <sub>2</sub> SO <sub>4</sub> | 0.05                     | 42.2 μg mg <sup>-1</sup> <sub>cat</sub> h <sup>-1</sup>                                                 | 44.3      | 16         |

2

3

4

5

## 1 **References**

- 2 1. L. Zhang, L. Ding, G. Chen, X. Yang, H. Wang, *Angew. Chem. Int. Ed.*, 2018, **58**, 2612-2642.
- 3 2. X. Zhu, T. Wu, L. Ji, C. Li, T. Wang, S. Wen, S. Gao, X. Shi, Y. Luo, Q. Peng, X. Sun, *J. Mater.*  
4 *Chem. A*, 2019, **7**, 16117.
- 5 3. C. Yang, B. Huang, S. Bai, Y. Feng, Q. Shao, X. Huang, *Adv. Mater.*, 2020, **32**, 2001267.
- 6 4. J. Kong, A. Lim, C. Yoon, J. Jang, H. Ham, J. Han, S. Nam, D. Kim, Y. Sung, J. Choi, H. Park,  
7 *ACS Sustain. Chem. Eng.*, 2017, **5**, 10986.
- 8 5. X. Wu, Z. Wang, Y. Han, D. Zhang, M. Wang, H. Li, H. Zhao, Y. Pan, J. Lai, L. Wang, *J. Mater.*  
9 *Chem. A*, 2020, **8**, 543.
- 10 6. W. Guo, Z. Liang, J. Zhao, B. Zhu, K. Cai, R. Zou, Q. Xu, *Small Methods.*, 2018, **2**, 1800204.
- 11 7. M. Wang, S. Liu, T. Qian, J. Liu, J. Zhou, H. Ji, J. Xiong, J. Zhong, C. Yan, *Nat. Commun.*, 2019,  
12 **10**, 341.
- 13 8. X. Liu, H. Jang, P. Li, J. Wang, Q. Qin, M. G. Kim, G. Li, J. Cho, *Angew. Chem. Int. Ed.*, 2019, **58**,  
14 13329-13334.
- 15 9. L. Hui, Y. Xue, H. Yu, Y. Liu, Y. Fang, C. Xing, B. Huang, Y. Li, *J. Am. Chem. Soc.*, 2019,  
16 **141**,10677-10683.
- 17 10. B. Hu, M. Hu, L. Seefeldt, T. L. Liu, *ACS Energy Lett*, 2019, **4**, 1053-1054.
- 18 11. J. Xia, Z. Yang, B. Wang, P. Wu, I. Popovs, H. Li, S. Irle, S. Dai, H. Zhu, *Nano Energy.*, 2020, **72**,  
19 104681.
- 20 12. H. Jin, L. Li, X. Liu, C. Tang, W. Xu, S. Chen, L. Song, Y. Zheng, S. Qiao, *Adv. Mater.*, 2019, **31**,  
21 1902709.
- 22 13. Y. Liu, M. Han, Q. Xiong, S. Zhang, C. Zhao, W. Gong, G. Wang, H. Zhang, H. Zhao, *Adv.*  
23 *Energy Mater.*, 2019, **9**, 1803935.
- 24 14. Y. Ma, T. Yang, H. Zou, Z. Kou, L. Mao, Y. Feng, L. Shen, J. Stephen, L. Duan, X. Li, J. Wang,  
25 *Adv. Mater.* 2020, 2002177.
- 26 15. G. Peng, J. Wu, M. Wang, J. Niklas, H. Zhou, C. Liu. *Nano Lett.* 2020, **20**, 2879-2885.
- 27 16. B. Qin, Y. Li, Q. Zhang, G. Yang, H. Liang, F. Peng, *Nano Energy.*2020, **68**, 104374.
